# Supplementary material for: Retrospective analysis of the national impact of industrial action by English junior doctors in 2016
Source: PubMed Central journal article supplement — BMJ Open. 2018 Feb 8;8(1):e019319. doi: 10.1136/bmjopen-2017-019319 (PMC5855458; doi:10.1136/bmjopen-2017-019319), 2018-02-08
Supplement: bmjopen-2017-019319.draft_revisions.pdf [file bmjopen-2017-019319.draft_revisions.pdf]

# BMJ Open

BMJ Open is committed to open peer review. As part of this commitment we make the peer review history of every article we publish publicly available.

When an article is published we post the peer reviewers' comments and the authors' responses online. We also post the versions of the paper that were used during peer review. These are the versions that the peer review comments apply to.

The versions of the paper that follow are the versions that were submitted during the peer review process. They are not the versions of record or the final published versions. They should not be cited or distributed as the published version of this manuscript.

BMJ Open is an open access journal and the full, final, typeset and author-corrected version of record of the manuscript is available on our site with no access controls, subscription charges or pay-per-view fees (<http://bmjopen.bmj.com>).

If you have any questions on BMJ Open's open peer review process please email [editorial.bmjopen@bmj.com](mailto:editorial.bmjopen@bmj.com)

# BMJ Open

## Retrospective analysis of the national impact of industrial action by English junior doctors in 2016

|                                 |                                                                                                                                                                                                                                                                                                                 |
|---------------------------------|-----------------------------------------------------------------------------------------------------------------------------------------------------------------------------------------------------------------------------------------------------------------------------------------------------------------|
| Journal:                        | <i>BMJ Open</i>                                                                                                                                                                                                                                                                                                 |
| Manuscript ID                   | bmjopen-2017-019319                                                                                                                                                                                                                                                                                             |
| Article Type:                   | Research                                                                                                                                                                                                                                                                                                        |
| Date Submitted by the Author:   | 24-Aug-2017                                                                                                                                                                                                                                                                                                     |
| Complete List of Authors:       | Furnivall, Daniel; Imperial College London, Department of Surgery and Cancer; Imperial College London, Dr Foster Unit, Department of Primary Care and Public health<br>Bottle, Alex; Imperial College, Primary Care and Social Medicine<br>Aylin, Paul; Imperial College London, Epidemiology and Public Health |
| <b>Primary Subject Heading</b>: | Health services research                                                                                                                                                                                                                                                                                        |
| Secondary Subject Heading:      | Ethics, Health informatics, Health policy                                                                                                                                                                                                                                                                       |
| Keywords:                       | ACCIDENT & EMERGENCY MEDICINE, NHS, Junior Doctors, Strikes, industrial action, outpatient                                                                                                                                                                                                                      |
|                                 |                                                                                                                                                                                                                                                                                                                 |

SCHOLARONE™  
Manuscripts

**Retrospective analysis of the national impact of industrial action by English junior doctors in 2016.**

Daniel Furnivall, Alex Bottle, Paul Aylin

**Author Details**

Mr Daniel Furnivall, research assistant<sup>1,2</sup>, Dr Alex Bottle, reader in medical statistics<sup>1</sup>, Prof Paul Aylin, professor of epidemiology and public health<sup>1</sup>

1. Dr Foster Unit, Department of Primary Care and Public Health, Imperial College London, 3 Dorset Rise, London, EC4Y 8EN
2. Department of Surgery and Cancer, Imperial College London, St Mary's Hospital, Praed Street, London, W2 1NY

**Corresponding author details**

Daniel Furnivall, (+44)7772543820, [d.furnivall@imperial.ac.uk](mailto:d.furnivall@imperial.ac.uk)

## Abstract

**Objectives:** To examine the impacts of the four episodes of industrial action by English junior doctors in early 2016.

**Design:** Descriptive retrospective study of admitted patient care, accident and emergency (A&E) and outpatient activity in English hospitals.

**Setting:** All hospitals across England.

**Participants:** All patients who attended A&E or outpatient appointments, or those who were admitted to hospital during the three week period surrounding each of the four strikes (January 12<sup>th</sup>, February 10<sup>th</sup>, March 9<sup>th</sup>-10<sup>th</sup> and April 26<sup>th</sup>-27<sup>th</sup>, excluding weekends.

**Main outcome measures:** Raw numbers and percentage changes of outpatient appointments and cancellations, A&E visits, admitted patients and all in-hospital mortality on strike days compared with patient activity on the same weekday in the weeks before and after the strikes.

**Results:** There were 3.4 million admissions, 27 million outpatient appointments and 3.4 million A&E attendances over the four 3-week periods analysed. Across the four strike days, there were 31,651 fewer admissions (-9.1%), 23,895 fewer A&E attendances (-6.8%) and 173,462 fewer outpatient appointments (-6.0%) than expected. Additionally, 101,109 more outpatient appointments were cancelled by hospitals than expected (+52%). The April 26<sup>th</sup>-27<sup>th</sup> strike, where emergency services were also affected, showed the largest impacts on regular service. Regional analysis showed that services in the Yorkshire and the Humber region were disproportionately more affected by the industrial action.

**Conclusions:** Industrial action by junior doctors during early 2016 caused a significant impact on the provision of healthcare provided by English hospitals. We also observed regional variations in how these strikes affected providers.

### What is already known on this topic

- Doctors' strikes are a rare occurrence in the UK, with only one occurring in the 40 years before 2016 (in which only 8% of NHS doctors participated).
- Strikes cause large impacts on hospital-ordered cancellations of outpatient appointments, admitted patient care and A&E visits. Few studies have shown any significant impacts on mortality from strikes.

### What this study adds

- This is the first UK study which looked at the effects of striking junior doctors, as well as the first to evaluate the impact of withheld in-hospital emergency services (the April 2016 strike was the first ever UK strike to include emergency care)
- Analysis of hospital administrative data from the 2016 strikes show a significant impact on outpatient appointments, admitted patient care and A&E visits.

## Introduction

In each of the first four months of 2016, junior doctors from all specialties in England engaged in industrial action with a series of 24-48 hour strikes, culminating in a two day strike which included the withdrawal of emergency services<sup>1</sup>. The purpose of the action was to protest new contractual changes for all junior doctors brought by the Department of Health (DoH) regarding safe working hours and pay<sup>2</sup>. Doctor's strikes in the UK are very rare – before the 2016 strikes, there had been only one, much smaller strike in the previous 40 years (in 2012)<sup>3,4</sup>.

Breaks from routine care patterns offer an important window into the effectiveness of currently established treatment services. During annual meetings of the American Heart Association and the American College of Cardiology, there are significant drops in 30-day mortality among high-risk patients admitted with heart attacks or cardiac failure<sup>5</sup>. Therefore, the 2016 strikes provide an ideal opportunity to evaluate the effectiveness of current systems and locate weaknesses in national responses to staffing shortages.

Metcalf et al<sup>6</sup> studied strikes among doctors in Los Angeles, Jerusalem, Spain, Croatia, South Africa and the UK. Almost all of the strikes they looked at showed little to no effect on patient mortality. In fact, only one (a 20 day long strike of all doctors in a single province in South Africa in 2010) reported increased mortality rates – patients who presented in emergency departments were 67% more likely to die than during a normal period<sup>6</sup>. Ruiz et al<sup>3</sup> analysed the 24-hour strike on 21<sup>st</sup> June 2012 in England, where approximately 8% of doctors in England took part.<sup>7</sup> For their analysis, they used Hospital Episode Statistics (HES), the national hospital administrative database for England's NHS, and compared the week of the strike with the week immediately following and preceding it. Their analysis found an increase in outpatient appointment cancellations, but no significant differences in mortality between strike and non-strike periods.

This current work aimed to examine the impact of the junior doctors' strikes in early 2016 using, Health Episode Statistics (HES), which contains data on NHS activity. This dataset allowed us to investigate trends in the number of admissions (inpatients), outpatient appointments cancellations, Accident and Emergency (A&E) attendances and in-hospital deaths during strike periods and to compare these with the expected numbers based on an average non-strike period.

## Methods

Hospital episode statistics include details of all admissions to NHS Hospitals in England and are collected by the Department of Health. HES data covering all recorded episodes of admitted patient care, outpatient appointments and A&E attendances were extracted for the week of each strike.

1  
2  
3 Strike action by English junior doctors took place on four occasions throughout early 2016 – January  
4 12<sup>th</sup>, February 10<sup>th</sup>, March 9<sup>th</sup>-10<sup>th</sup> and April 26<sup>th</sup>-27<sup>th</sup>. For comparison with normal operations, we  
5 also extracted all data from the weeks immediately preceding and following each strike. For  
6 simplicity, weekends were excluded from our analysis.  
7  
8

9  
10 Due to the impact upon normal hospital operations and attendance due to the bank holiday on the  
11 week of the 2<sup>nd</sup> of May, the second comparator week was replaced with the week of May 9<sup>th</sup>-13<sup>th</sup> for  
12 the April strike.  
13  
14

15 Each hospital admission is recorded as a “spell” consisting of a number of “consultant episodes,”  
16 which denotes period of care under different consultants during their hospital admission<sup>8</sup>. If the  
17 patient admission includes transfer to other hospitals before they are discharged, the whole period  
18 of care is recorded as a “superspell.” For our analysis of admitted patient care, only the first  
19 “episode” in a superspell of care was used to identify the date of initial admission, so as to avoid  
20 multiple counting.  
21  
22  
23  
24

25 The data from the comparator weeks were averaged into what was assumed to be a “normal” week.  
26 This allowed for comparison with the strike data to provide an indication of the impacts of individual  
27 strikes.  
28  
29

30 Daily totals for A&E attendances, outpatient appointments and hospital admissions were calculated.  
31 Admitted patients were separated into elective and emergency categories using the “admimeth”  
32 method of admission field in HES. Day surgery cases were extracted using the “CLASSPAT” field.  
33  
34  
35

36 Outpatient appointments were analysed using the “attended” field, which includes the following  
37 categories:  
38

39 0 = Not applicable - appointment occurs in the future

40 2 = Appointment cancelled by, or on behalf of, the patient

41 3 = Did not attend - no advance warning given

42 4 = Appointment cancelled or postponed by the health care provider

43 5 = Seen, having attended on time or, if late, before the relevant care professional was ready  
44 to see the patient

45 6 = Arrived late, after the relevant care professional was ready to see the patient, but was seen

46 7 = Did not attend - patient arrived late and could not be seen

47 9 = Not known  
48  
49  
50  
51  
52  
53  
54  
55  
56  
57  
58  
59  
60

This analysis, as with Ruiz et al's analysis of a June 2012 strike<sup>3</sup>, focused primarily on category 4 for cancellations, and categories 5&6 to denote actual attendance of appointments.

To obtain death counts, the discharge method field ("dismeth") was used to capture deaths in hospital. The A&E attendance disposal field ("aeattenddisp") was used to determine which patients died within the A&E department. HES Outpatient data do not have the capability to record deaths during appointments, so these data were not used for this outcome.

Finally, regional analyses were performed on all outpatient, A&E and admitted patient data using provider code data ("procode").

For our analysis, it was assumed that patient counts were described by a Poisson distribution and a Chi-squared test was used to evaluate significance for proportions. All  $p$  values < 0.05 were considered statistically significant.

### Patient Involvement

No patients were involved in setting the research question or the outcome measures; nor were they involved in the design and implementation of the study. There are no plans to involve patients in the dissemination of results.

### Results

In total, this study involved the extraction and analysis of 3.4 million admissions, 27 million outpatient appointments and 3.4 million A&E attendances over 12 weeks.

Table 2 shows the impacts of the industrial action of early 2016 upon admitted patient care, outpatient appointments and A&E.

| Strike                                | Tuesday 12th January | Wednesday 10th February | Wednesday 9th-Thursday 10th March | Tuesday 26th-Wednesday April 27th       | Total            |
|---------------------------------------|----------------------|-------------------------|-----------------------------------|-----------------------------------------|------------------|
| <b>Services Withheld</b>              | Routine care only    | Routine care only       | Routine care only                 | All services (including emergency care) |                  |
| <b>Total Admissions</b>               | 53,279               | 54,558                  | 107,243                           | 99,866                                  | 314,946          |
| <b>Change in total admissions</b>     | -4,951 (-8.5%)*      | -2,633 (-4.6%)*         | -5,873 (-5.2%)*                   | -18,194 (-15.4%)*                       | -31,651 (-9.1%)  |
| <b>Emergency admissions</b>           | 20,307               | 21,005                  | 40,908                            | 40,077                                  | 122,297          |
| <b>Change in emergency admissions</b> | -1,313 (-6.1%)*      | -30 (-0.1%)             | -99 (-0.2%)                       | -3,383 (-7.8%)*                         | -4,825 (-3.7%)   |
| <b>Elective admissions</b>            | 32,972               | 33,553                  | 66,335                            | 59,789                                  | 192,649          |
| <b>Change in elective admissions</b>  | -3,638 (-9.9%)*      | -2,603 (-7.2%)*         | -5,775 (-8.0%)*                   | -14,811(-19.9%)*                        | -26,827 (-12.2%) |

|                                                                |                  |                  |                  |                    |                   |
|----------------------------------------------------------------|------------------|------------------|------------------|--------------------|-------------------|
| <b>Day case admissions</b>                                     | 23,455           | 23,664           | 47,286           | 42,734             | 137,139           |
| <b>Change in day case admissions</b>                           | -2,367(-9.2%)*   | -1,809 (-7.1%)*  | -3,863 (-7.6%)*  | -9,846 (-18.7%)*   | -17,885 (-11.5%)  |
| <b>Total outpatient Appointments</b>                           | 470,639          | 439,599          | 871,540          | 881,213            | 2,662,991         |
| <b>Change in total outpatient appointments</b>                 | -14,663 (-3.0%)* | -7,702 (-1.7%)*  | -41,182 (-4.5%)* | -109,915 (-11.1%)* | -173,462 (-6.0%)  |
| <b>Outpatient Appointments completed</b>                       | 352,808          | 333,625          | 658,348          | 651,028            | 1,995,809         |
| <b>Change in outpatient appointments completed</b>             | -29,791 (-7.8%)* | -18,305 (-5.2%)* | -59,692 (-8.3%)* | -134,711 (-17.1%)* | -242,499 (-10.6%) |
| <b>Outpatient appointments cancelled by provider</b>           | 49,967           | 45,222           | 90,272           | 109,383            | 294,844           |
| <b>Change in outpatient appointments cancelled by provider</b> | 17,641 (+54.6%)* | 12,739 (+39.2%)* | 26,906 (+42.5%)* | 43,823 (+66.8%)*   | 101,109 (+52.1%)  |
| <b>A&amp;E total attendances</b>                               | 48,827           | 55,842           | 114,292          | 100,569            | 319,530           |
| <b>Change in A&amp;E total attendances</b>                     | -5,219 (-9.7%)*  | 963 (+1.8%)*     | -2314 (-2.0%)*   | -17,325 (-14.7%)*  | -23,895 (-6.8%)   |
| <b>Emergency admission deaths</b>                              | 616              | 583              | 1011             | 999                | 3,209             |
| <b>Change in emergency admission deaths</b>                    | 16 (+2.7%)       | 24 (+4.3%)       | 40 (+4.1%)       | -40 (-3.8%)        | 40 (+1.3%)        |
| <b>Elective admission deaths</b>                               | 21               | 18               | 30               | 29                 | 98                |
| <b>Change in elective admission deaths</b>                     | 0                | 1 (+5.9%)        | 1 (+3.4%)        | -2 (-6.5%)         | 0                 |
| <b>A&amp;E deaths</b>                                          | 73               | 46               | 127              | 110                | 356               |
| <b>Change in A&amp;E deaths</b>                                | 10 (+15.9%)      | -11 (-19.2%)     | 21 (+19.8%)      | 11 (+11.1%)        | 31 (9.75%)        |
| <b>Total deaths</b>                                            | 710              | 647              | 1,168            | 1,138              | 3,663             |
| <b>Change in total deaths</b>                                  | 26 (+3.8%)       | 14 (+2.2%)       | 62 (+5.6%)       | -31 (-2.7%)        | 71 (2.0%)         |

Table 1- Results of Strike Analyses. Statistical significance at the 5% level as given by the Chi-Squared test is denoted with asterisks. Percentage change vs expected non-strike volumes are shown in brackets.



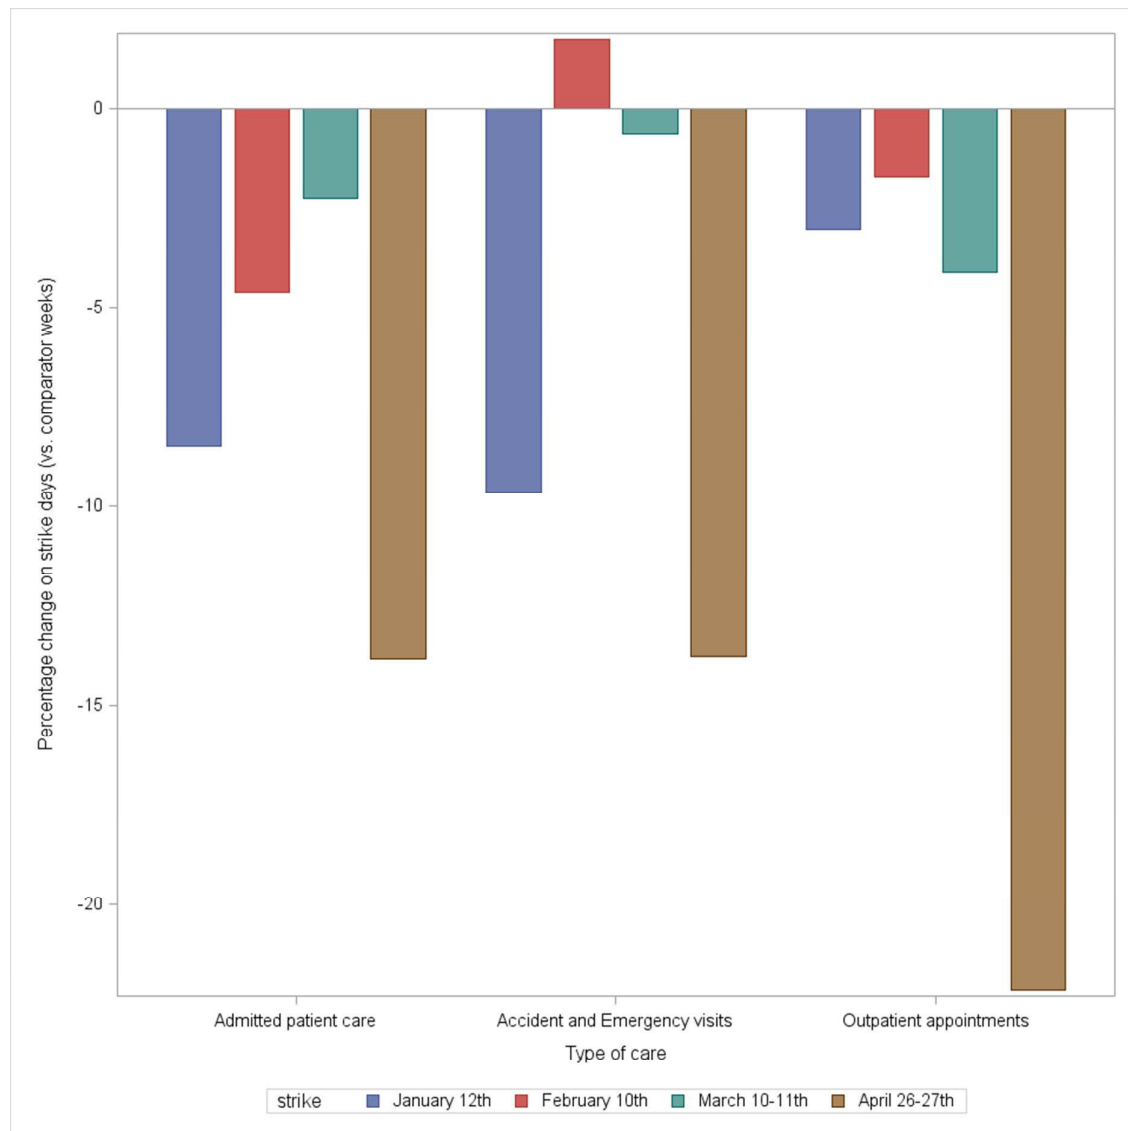

Figure 1 - Impacts of each of the four strikes on hospital activity across all strikes and types of care

Figure 1 shows the percentage change in A&E visits, admitted patients and outpatient appointments across all four strikes against the average of the chosen comparator weeks.

The largest impacts upon normal operations were seen in the April strike. This is to be expected, as it lasted 48 hours and was also the only instance where emergency care was also withheld.

During the April strike, there was a decrease in total admissions of 18,194 patients compared with the expected volume for that period, which comprised a 7.8% decrease in emergency admissions and a 19.9% decrease in elective admissions. Day cases showed a reduction of 9,846 patients, (18.7%) compared with the comparator weeks.

1  
2  
3 Furthermore, 109,915 (11.1%) fewer outpatient appointments were scheduled during the strike  
4 period than usual and 134,711 (17.1%) fewer outpatient appointments were attended during strike  
5 days. This was paired with an increase in provider cancellations of outpatient appointments of  
6 43,823 (+66.8%). Additionally, fewer patients attended A&E during this period, with 17,325 (-14.7%)  
7 fewer attendees than expected.  
8  
9

10  
11 The first strike which occurred (Tuesday January 12<sup>th</sup> 2016) also showed a large and significant (9.6%)  
12 decrease in A&E attendance, despite A&E services operating normally during this time. This may be  
13 due to significant media attention for this particular strike, due to its historic significance.  
14 Additionally, some providers warned patients to avoid hospitals “unless absolutely necessary”<sup>9</sup>. This  
15 effect diminished during the February and March strikes.  
16  
17  
18

19  
20 Over the course of all 6 of the strike days in 2016, 23,895 fewer A&E attendances occurred than  
21 expected. 1,995,809 outpatient appointments occurred, representing a drop of 242,499 from the  
22 expected volume during this period. Providers cancelled a total of 294,844 outpatient appointments,  
23 a 52% increase compared with the expected volume during these periods.  
24  
25  
26  
27  
28  
29  
30  
31  
32  
33  
34  
35  
36  
37  
38  
39  
40  
41  
42  
43  
44  
45  
46  
47  
48  
49  
50  
51  
52  
53  
54  
55  
56  
57  
58  
59  
60

During all strike days, a total of 3209 patients died in hospital during emergency admissions, 98 during elective admissions and 356 died in A&E. However, numbers of recorded hospital deaths did not appear to change significantly during the strikes compared with expected numbers for either admitted patients or A&E, which is in line with what has been seen in most other studies of striking doctors globally.<sup>6</sup>

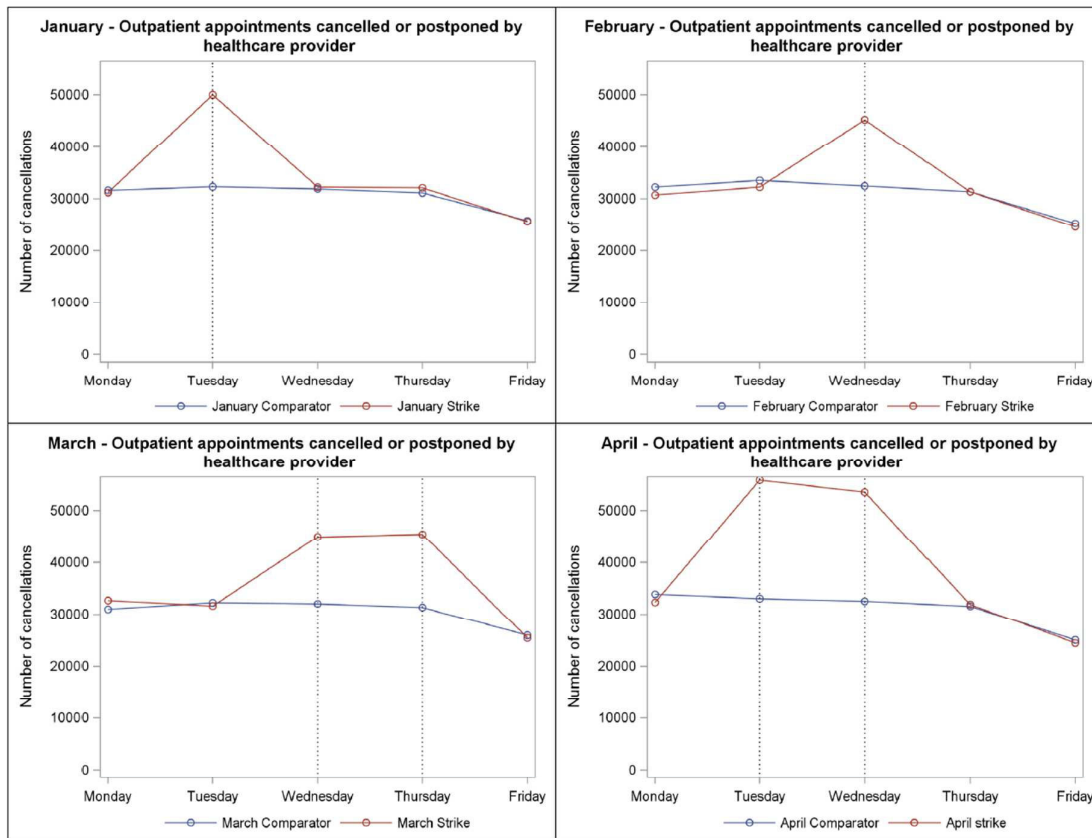

Figure 2 – Volume of provider cancellations by day during the week in which each of the four strikes occurred. Vertical grey lines on the graph represent strike days.

## Cancellations

Figure 2 shows the impacts of strikes upon the numbers of appointments cancelled or postponed by health care providers. The largest impacts were seen during the January and April strikes, which showed increases of 54.5% and 66.8% compared with expected cancellations. Our analysis found that 101,109 outpatient appointments were cancelled due to strike action in 2016.

## Regional analysis

| Region           | Change in elective admissions (%) | Change in non-elective admissions (%) | Change in outpatient appointments attended (%) | Change in outpatient cancellations (%) | Change in A&E visits (%) |
|------------------|-----------------------------------|---------------------------------------|------------------------------------------------|----------------------------------------|--------------------------|
| North East       | -9.31*                            | -4.69*                                | -6.99*                                         | +41.89*                                | -7.8*                    |
| North West       | -13.3*                            | -1.61*                                | -13.35*                                        | +52.85*                                | -6.24*                   |
| Yorkshire/Humber | -13.59*                           | -4.88*                                | -11.86*                                        | +65.68*                                | -8.05*                   |
| East Midlands    | -13.6*                            | -2.49*                                | -12.62*                                        | +44.69*                                | -7.55*                   |
| West Midlands    | -8.37*                            | -5.24*                                | -8.39*                                         | +45.41*                                | -6.53*                   |
| East of England  | -9.81*                            | -3.76*                                | -9.43*                                         | +44.89*                                | -5.93*                   |
| London           | -17.08*                           | -3.61*                                | -13.39*                                        | +68.2*                                 | -6.79*                   |
| South East Coast | -14.51*                           | -5.21*                                | -10.89*                                        | +67.1*                                 | -6.97*                   |
| South Central    | -10.15*                           | -2.56*                                | -7.31*                                         | +22.63*                                | -7.74*                   |
| South West       | -11.59*                           | -4.02*                                | -10.88*                                        | +52.02*                                | -7.29*                   |

Table 2 - Regional analyses of strike impacts. Statistical significance at the 5% level as given by the Chi-Squared test is denoted with asterisks

Table 2 shows the differential regional impacts of the strikes on both outpatient appointments and cancellations. This analysis shows particularly large increases in outpatient cancellations by healthcare providers in London, the south east coast and Yorkshire/the Humber. These areas also showed large decreases in the number of overall outpatient appointments attended. The East Midlands also showed a large decrease in overall appointment attendance. The south central region showed a much smaller increase in cancellations than others.

The table also shows the regional variation in admitted patient care during strike periods, separated by elective admissions (including day cases) and non-elective emergency admissions. As with outpatient appointments, the most prominently affected regions by the strikes for elective admissions were Yorkshire and the Humber, London and the East Midlands, which all showed sizable drops in recorded elective admissions. For emergency (i.e. non-elective) admissions, recorded

1  
2  
3 impacts were smaller and seemed to affect different areas, such as the South West and West  
4 Midlands.  
5

6 Our analysis found an average reduction in A&E patient volume of 7.09% across all strike days. The  
7 largest regional drops in volume were found in Yorkshire and the Humber (8.05%) and the North  
8 East (7.8%). Impacts were more limited in the East of England (5.93%) and the North West (6.24%).  
9

## 10 11 12 **Discussion**

13  
14 We found that industrial action by junior doctors in 2016 resulted in total 31,651 fewer admissions,  
15 173,462 fewer outpatient appointments and 23,895 fewer A&E attendances compared with  
16 expected volumes from similar weeks. Large effects were seen in the numbers of cancelled  
17 outpatient appointments by healthcare providers, with an average increase in cancellations of 52.2%  
18 during strike days. The most pronounced effects on NHS operations were seen during the first  
19 (January 12<sup>th</sup>) and last (April 26<sup>th</sup>-27<sup>th</sup>) strikes. Regional analysis showed that strikes  
20 disproportionately affected London, Yorkshire and the Humber and the East Midlands for outpatient  
21 appointments and elective admissions. Emergency admissions were most affected in the South West  
22 and West Midlands regions. A&E attendance was most affected in the North East, Yorkshire and the  
23 Humber and South Central England. The January 12<sup>th</sup> strike corresponded with a 9% drop in A&E  
24 admissions, despite industrial action not affecting emergency services. This is noteworthy as it  
25 implies many patients may have consciously avoided going to hospital during this period, perhaps  
26 due to intense media coverage of the event and explicit instructions from some providers to avoid all  
27 non-urgent hospital attendances.  
28  
29

30 Our analysis is broadly consistent with similar studies of this type. Prior work by Ruiz et al<sup>3</sup> has  
31 shown the effects of striking doctors on outpatient cancellations by provider. This work replicates  
32 that effect – during the strike on April 26<sup>th</sup>-27<sup>th</sup> 2016, there was an increase in cancellations of 67%  
33 when compared with average figures from the surrounding weeks. As with Ruiz et al<sup>3</sup> and other  
34 papers<sup>6</sup>, this work did not find a significant effect on mortality among either admitted or A&E  
35 patients during strike days. This could be either because there is no effect, or our study did not have  
36 enough power to demonstrate an effect, due to the small study period involved in strike days. It may  
37 be the case that during periods of industrial action, staffing priority is given to critical care, resulting  
38 in small differences in mortality but a poorer patient experience in non-vital care, as discussed by  
39 Metcalfe et al<sup>6</sup>.  
40  
41  
42  
43  
44  
45  
46  
47  
48  
49  
50  
51  
52

53 This is a large national study which was able to analyse the majority of admissions, outpatient  
54 appointments and A&E visits during the 2016 strikes. Hospital episode statistics have previously  
55  
56  
57  
58  
59  
60

1  
2  
3 been shown to have reasonable accuracy at both outpatient<sup>10</sup> and inpatient<sup>11</sup> levels. Furthermore,  
4 the strike on April 26<sup>th</sup> and 27<sup>th</sup> also demonstrates the first opportunity for researchers in the UK to  
5 investigate the effects of industrial action upon emergency personnel – previous strikes did not  
6 withhold emergency care. During this period, there was a drop in the number of patients attending  
7 A&E of 17,325 (almost 15%) compared with the expected volume for this time period.  
8  
9

10  
11 The weaknesses of this work are predominantly due to what was not investigated – for example, HES  
12 data alone do not allow the investigation of the effects of strikes upon patients who did not attend  
13 A&E during this period. Furthermore, analysis focused only on the weeks where strikes occurred,  
14 which prevented the capture of lagged effects in the immediate aftermath of a strike. Outcomes  
15 (especially mortality) proved more difficult to measure. Death counts during strike days were small,  
16 and hence lacking in statistical power, and many patients stayed in hospital for more than a single  
17 day. Importantly, other outcomes such as uncaptured morbidity, as well as opportunity costs for  
18 both the NHS (through rescheduling elective operations and other procedures) and patients (taking  
19 time off work, childcare costs etc) were uncaptured. This study also includes no qualitative element,  
20 which prevents us from capturing unrecorded outcomes of strikes, such as disappointment,  
21 inconvenience, stress and worry. Finally, the occurrence of a national bank holiday on the week of  
22 the 2<sup>nd</sup> of May meant that patient profiles were likely to differ between strike and comparator weeks.  
23 As such, in our analysis the second comparator week for the April strike was replaced with data from  
24 the week of May 9<sup>th</sup>-13<sup>th</sup> instead.  
25  
26  
27  
28  
29  
30  
31  
32  
33

### 34 **Conclusions**

35  
36 The four junior doctor's strikes between January-April 2016 resulted in significant negative impacts  
37 upon patient care as measured by hospital activity. Significant increases in outpatient appointment  
38 cancellations by hospitals were paired with decreases in admitted patients and A&E visits. The major  
39 outcome we investigated was mortality, which is likely to be the least sensitive to quality and safety  
40 concerns. Future work in this area should focus on how the strikes affected waiting times and similar  
41 quality outcomes. Strike-related morbidity (such as disease progression in the time between  
42 rescheduled operations/appointments) would likely be a fertile avenue for investigation. Delays will  
43 also be likely to have an associated cost burden in terms of worse patient outcomes and hence  
44 costlier treatment. Finally, it should be determined whether quality of care was negatively impacted  
45 in the period immediately following the strikes.  
46  
47  
48  
49  
50  
51  
52  
53  
54  
55  
56  
57  
58  
59  
60

### **Contributorship statement**

All persons who meet authorship criteria are listed as authors, and all authors certify that they have participated sufficiently in the work to take public responsibility for the content, including participation in the concept, design, analysis, writing, or revision of the manuscript.

Study design: Paul Aylin, Daniel Furnivall

Data collection: Daniel Furnivall

Data analysis and interpretation: Daniel Furnivall, Alex Bottle, Paul Aylin

Drafting the article: Daniel Furnivall

Critical revision of the article: Paul Aylin, Alex Bottle

Final approval of version to be published: Paul Aylin, Alex Bottle, Daniel Furnivall

Guarantor: Paul Aylin

### **Transparency Declaration**

Professor Paul Aylin affirms that this manuscript is an honest, accurate, and transparent account of the study being reported; that no important aspects of the study have been omitted; and that any discrepancies from the study as planned (and, if relevant, registered) have been explained.

### **Copyright**

The Corresponding Author has the right to grant on behalf of all authors and does grant on behalf of all authors, a worldwide licence to the Publishers and its licensees in perpetuity, in all forms, formats and media (whether known now or created in the future), to i) publish, reproduce, distribute, display and store the Contribution, ii) translate the Contribution into other languages, create adaptations, reprints, include within collections and create summaries, extracts and/or, abstracts of the Contribution, iii) create any other derivative work(s) based on the Contribution, iv) to exploit all subsidiary rights in the Contribution, v) the inclusion of electronic links from the Contribution to third party material where-ever it may be located; and, vi) licence any third party to do any or all of the above.

### **Competing Interests Declaration**

All authors have completed the ICMJE uniform disclosure form at [www.icmje.org/coi\\_disclosure.pdf](http://www.icmje.org/coi_disclosure.pdf) (available on request from the corresponding author) and declare: no support from any organisation for the submitted work; no other relationships or activities that could appear to have influenced the submitted work. PA is principal investigator for The Dr Foster Unit, an academic unit in the

1  
2  
3 Department of Primary Care and Public Health, within the School of Public Health, Imperial College  
4 London. The unit receives research funding from Dr Foster Intelligence, an independent health  
5 service research organisation (a wholly owned subsidiary of Telstra).  
6  
7

### 8 **Funding acknowledgements**

9  
10 The Dr Foster Unit is an academic unit in the Department of Primary Care and Public Health, within  
11 the School of Public Health, Imperial College London. The unit receives research funding from the  
12 National Institute of Health Research and Dr Foster Intelligence, an independent health service  
13 research organisation (a wholly owned subsidiary of Telstra). The Dr Foster Unit at Imperial is  
14 affiliated with the National Institute of Health Research (NIHR) Imperial Patient Safety Translational  
15 Research Centre. The NIHR Imperial Patient Safety Translational Centre is a partnership between the  
16 Imperial College Healthcare NHS Trust and Imperial College London. The Department of Primary  
17 Care & Public Health at Imperial College London is grateful for support from the NW London NIHR  
18 Collaboration for Leadership in Applied Health Research & Care (CLAHRC) and the Imperial NIHR  
19 Biomedical Research Centre.  
20  
21  
22  
23  
24  
25

### 26 **Ethics**

27  
28 The principal investigator has approval from the Secretary of State and the Health Research  
29 Authority under Regulation 5 of the Health Service (Control of Patient Information) Regulations 2002  
30 to hold confidential data and analyse them for research purposes (CAG ref 15/CAG/0005). We have  
31 approval to use them for research and measuring quality of delivery of healthcare, from the London  
32 - South East Ethics Committee (REC ref 15/LO/0824).  
33  
34  
35  
36  
37

### 38 **Data Sharing Statement**

39 All SAS code used in the study is available upon request from the corresponding author.  
40  
41

### 42 **References**

- 43 1. Godlee F. Breaking point. *BMJ* 2016; **353**.
- 44 2. Toynbee M, Al-Diwani AA, Clacey J, Broome MR. Should junior doctors strike? *Journal of*  
45 *medical ethics* 2016; **42**(3): 167-70.
- 46 3. Ruiz M, Bottle A, Aylin P. A retrospective study on the impact of the doctors' strike in  
47 England on 21 June 2012. *Journal of the Royal Society of Medicine* 2013: 0141076813490685.
- 48 4. McKay AJ, Majeed A. Junior Doctors in England Strike for the First Time in 40 Years. *The*  
49 *Journal of Ambulatory Care Management* 2016; **39**(2): 178-81.
- 50 5. Jena AB, Prasad V, Goldman DP, Romley J. Mortality and treatment patterns among patients  
51 hospitalized with acute cardiovascular conditions during dates of national cardiology meetings.  
52 *JAMA Internal Medicine* 2015; **175**(2): 237-44.
- 53 6. Metcalfe D, Chowdhury R, Salim A. What are the consequences when doctors strike? *BMJ*  
54 2015; **351**.
- 55 7. Trigg N. Disruption to patients 'more limited than feared'. BBC News. 2012.  
56  
57  
58  
59  
60



- 1
- 2
- 3 8. Aylin P, Bottle A, Jen MH, Middleton S, Intelligence F. HSMR mortality indicators. *Imperial*
- 4 *College Technical Document 26th November 2010.*
- 5 9. NHS. Pennine Acute Hospitals Junior Doctor's National Strike 12 January: Patients advised to
- 6 avoid coming to hospital unless absolutely necessary. 2016.
- 7 10. Thorn JC, Turner E, Hounscome L, et al. Validation of the Hospital Episode Statistics
- 8 Outpatient Dataset in England. *PharmacoEconomics* 2016; **34**(2): 161-8.
- 9 11. Thorn JC, Turner EL, Hounscome L, et al. Validating the use of Hospital Episode Statistics data
- 10 and comparison of costing methodologies for economic evaluation: an end-of-life case study from
- 11 the Cluster randomised triAl of PSA testing for Prostate cancer (CAP). *BMJ open* 2016; **6**(4): e011063.
- 12
- 13
- 14
- 15
- 16
- 17
- 18
- 19
- 20
- 21
- 22
- 23
- 24
- 25
- 26
- 27
- 28
- 29
- 30
- 31
- 32
- 33
- 34
- 35
- 36
- 37
- 38
- 39
- 40
- 41
- 42
- 43
- 44
- 45
- 46
- 47
- 48
- 49
- 50
- 51
- 52
- 53
- 54
- 55
- 56
- 57
- 58
- 59
- 60

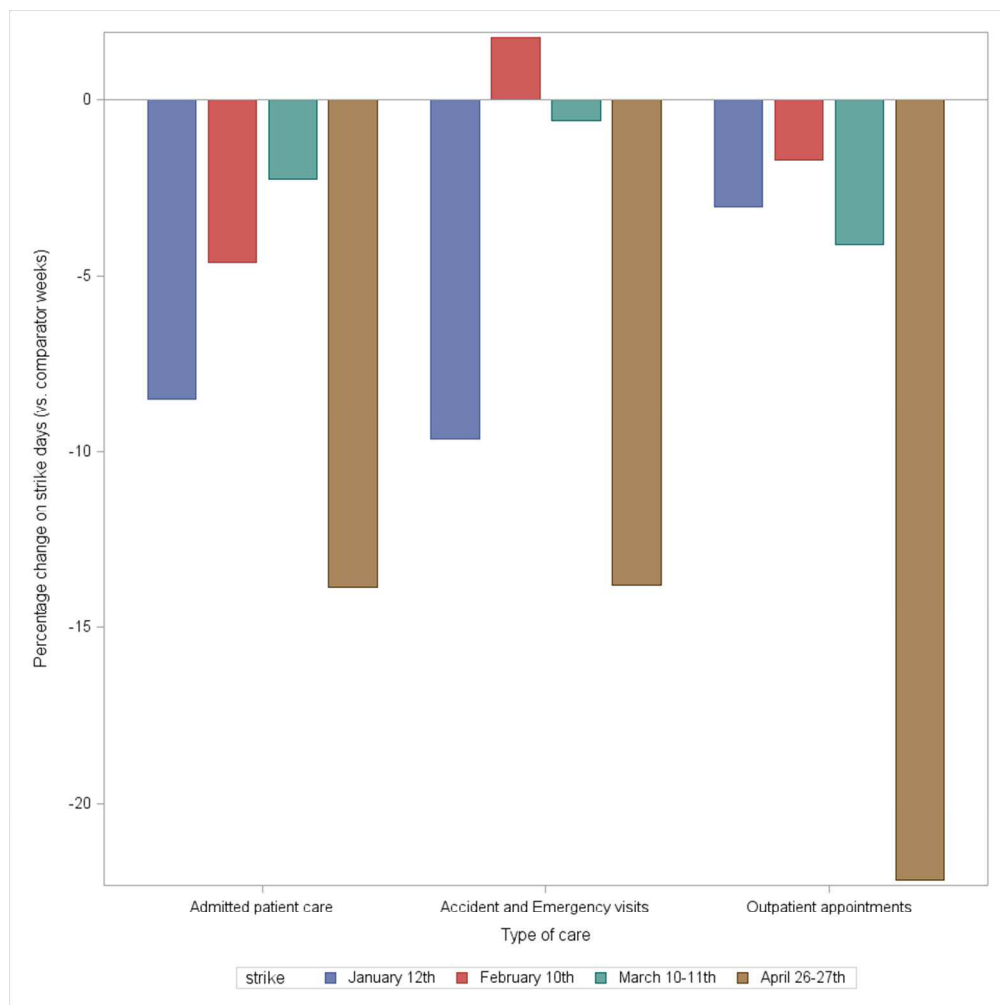

Figure 1 - Impacts of each of the four strikes on hospital activity across all strikes and types of care

1  
2  
3  
4  
5  
6  
7  
8  
9  
10  
11  
12  
13  
14  
15  
16  
17  
18  
19  
20  
21  
22  
23  
24  
25  
26  
27  
28  
29  
30  
31  
32  
33  
34  
35  
36  
37  
38  
39  
40  
41  
42  
43  
44  
45  
46  
47  
48  
49  
50  
51  
52  
53  
54  
55  
56  
57  
58  
59  
60

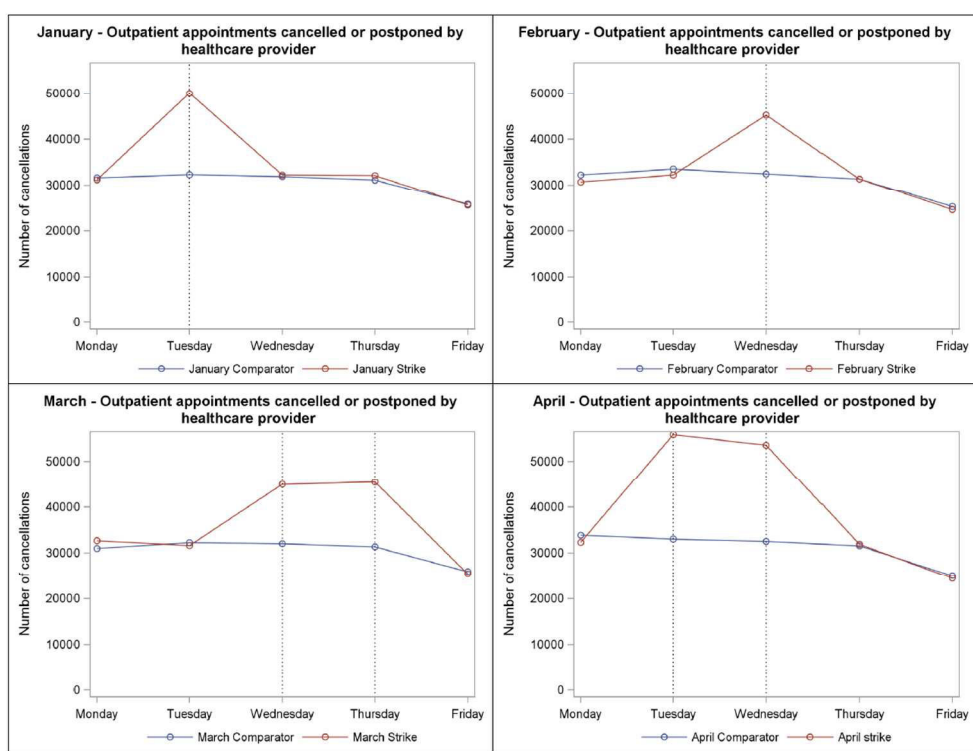

Figure 2 - Volume of provider cancellations by day during the week in which each of the four strikes occurred. Vertical grey lines on the graph represent strike days.

## STROBE Statement—checklist of items that should be included in reports of observational studies

|                              | Item No | Recommendation                                                                                                                                                                                                                                                                                                                                                                                                                                                                                                                                                                                                                                                                                                            |
|------------------------------|---------|---------------------------------------------------------------------------------------------------------------------------------------------------------------------------------------------------------------------------------------------------------------------------------------------------------------------------------------------------------------------------------------------------------------------------------------------------------------------------------------------------------------------------------------------------------------------------------------------------------------------------------------------------------------------------------------------------------------------------|
| <b>Title and abstract</b>    | 1       | (a) Indicate the study's design with a commonly used term in the title or the abstract ( <b>Page 1</b> )<br>(b) Provide in the abstract an informative and balanced summary of what was done and what was found ( <b>Page 2</b> )                                                                                                                                                                                                                                                                                                                                                                                                                                                                                         |
| <b>Introduction</b>          |         |                                                                                                                                                                                                                                                                                                                                                                                                                                                                                                                                                                                                                                                                                                                           |
| Background/rationale         | 2       | Explain the scientific background and rationale for the investigation being reported ( <b>Pages 2&amp;3</b> )                                                                                                                                                                                                                                                                                                                                                                                                                                                                                                                                                                                                             |
| Objectives                   | 3       | State specific objectives, including any prespecified hypotheses ( <b>Centre of page 3</b> )                                                                                                                                                                                                                                                                                                                                                                                                                                                                                                                                                                                                                              |
| <b>Methods</b>               |         |                                                                                                                                                                                                                                                                                                                                                                                                                                                                                                                                                                                                                                                                                                                           |
| Study design                 | 4       | Present key elements of study design early in the paper ( <b>Pages 3&amp;4</b> )                                                                                                                                                                                                                                                                                                                                                                                                                                                                                                                                                                                                                                          |
| Setting                      | 5       | Describe the setting, locations, and relevant dates, including periods of recruitment, exposure, follow-up, and data collection ( <b>Page 4</b> )                                                                                                                                                                                                                                                                                                                                                                                                                                                                                                                                                                         |
| Participants                 | 6       | (a) <i>Cohort study</i> —Give the eligibility criteria, and the sources and methods of selection of participants. Describe methods of follow-up<br><i>Case-control study</i> —Give the eligibility criteria, and the sources and methods of case ascertainment and control selection. Give the rationale for the choice of cases and controls<br><i>Cross-sectional study</i> —Give the eligibility criteria, and the sources and methods of selection of participants ( <b>Pages 4&amp;5</b> )<br>(b) <i>Cohort study</i> —For matched studies, give matching criteria and number of exposed and unexposed<br><i>Case-control study</i> —For matched studies, give matching criteria and the number of controls per case |
| Variables                    | 7       | Clearly define all outcomes, exposures, predictors, potential confounders, and effect modifiers. Give diagnostic criteria, if applicable ( <b>Page 5&amp;6</b> )                                                                                                                                                                                                                                                                                                                                                                                                                                                                                                                                                          |
| Data sources/<br>measurement | 8*      | For each variable of interest, give sources of data and details of methods of assessment (measurement). Describe comparability of assessment methods if there is more than one group ( <b>Page 3</b> )                                                                                                                                                                                                                                                                                                                                                                                                                                                                                                                    |
| Bias                         | 9       | Describe any efforts to address potential sources of bias ( <b>Top of page 4</b> )                                                                                                                                                                                                                                                                                                                                                                                                                                                                                                                                                                                                                                        |
| Study size                   | 10      | Explain how the study size was arrived at ( <b>N/A - entire population</b> )                                                                                                                                                                                                                                                                                                                                                                                                                                                                                                                                                                                                                                              |
| Quantitative variables       | 11      | Explain how quantitative variables were handled in the analyses. If applicable, describe which groupings were chosen and why ( <b>N/A – counts only</b> )                                                                                                                                                                                                                                                                                                                                                                                                                                                                                                                                                                 |
| Statistical methods          | 12      | (a) Describe all statistical methods, including those used to control for confounding ( <b>page 4,5,6</b> )<br>(b) Describe any methods used to examine subgroups and interactions ( <b>Pages 5+10</b> )<br>(c) Explain how missing data were addressed ( <b>N/A</b> )<br>(d) <i>Cohort study</i> —If applicable, explain how loss to follow-up was addressed<br><i>Case-control study</i> —If applicable, explain how matching of cases and controls was addressed<br><i>Cross-sectional study</i> —If applicable, describe analytical methods taking account of sampling strategy ( <b>Pages 3&amp;4</b> )<br>(e) Describe any sensitivity analyses ( <b>N/A</b> )                                                      |

Continued on next page

**Results**

|                  |     |                                                                                                                                                                                                                                                                                                                                                                                                                                      |
|------------------|-----|--------------------------------------------------------------------------------------------------------------------------------------------------------------------------------------------------------------------------------------------------------------------------------------------------------------------------------------------------------------------------------------------------------------------------------------|
| Participants     | 13* | (a) Report numbers of individuals at each stage of study—eg numbers potentially eligible, examined for eligibility, confirmed eligible, included in the study, completing follow-up, and analysed ( <b>Pages 5&amp;6</b> )<br>(b) Give reasons for non-participation at each stage (N/A)<br>(c) Consider use of a flow diagram (N/A)                                                                                                 |
| Descriptive data | 14* | (a) Give characteristics of study participants (eg demographic, clinical, social) and information on exposures and potential confounders ( <b>N/A – entire population</b> )<br>(b) Indicate number of participants with missing data for each variable of interest ( <b>N/A</b> )<br>(c) <i>Cohort study</i> —Summarise follow-up time (eg, average and total amount)                                                                |
| Outcome data     | 15* | <i>Cohort study</i> —Report numbers of outcome events or summary measures over time<br><i>Case-control study</i> —Report numbers in each exposure category, or summary measures of exposure<br><i>Cross-sectional study</i> —Report numbers of outcome events or summary measures ( <b>Pages 5&amp;6</b> )                                                                                                                           |
| Main results     | 16  | (a) Give unadjusted estimates and, if applicable, confounder-adjusted estimates and their precision (eg, 95% confidence interval). Make clear which confounders were adjusted for and why they were included ( <b>Page 5,6,10</b> )<br>(b) Report category boundaries when continuous variables were categorized<br>(c) If relevant, consider translating estimates of relative risk into absolute risk for a meaningful time period |
| Other analyses   | 17  | Report other analyses done—eg analyses of subgroups and interactions, and sensitivity analyses ( <b>Page 10 – regional analysis</b> )                                                                                                                                                                                                                                                                                                |

**Discussion**

|                  |    |                                                                                                                                                                                               |
|------------------|----|-----------------------------------------------------------------------------------------------------------------------------------------------------------------------------------------------|
| Key results      | 18 | Summarise key results with reference to study objectives ( <b>Page 11</b> )                                                                                                                   |
| Limitations      | 19 | Discuss limitations of the study, taking into account sources of potential bias or imprecision. Discuss both direction and magnitude of any potential bias ( <b>Page 12</b> )                 |
| Interpretation   | 20 | Give a cautious overall interpretation of results considering objectives, limitations, multiplicity of analyses, results from similar studies, and other relevant evidence ( <b>Page 12</b> ) |
| Generalisability | 21 | Discuss the generalisability (external validity) of the study results ( <b>Page 12</b> )                                                                                                      |

**Other information**

|         |    |                                                                                                                                                                                  |
|---------|----|----------------------------------------------------------------------------------------------------------------------------------------------------------------------------------|
| Funding | 22 | Give the source of funding and the role of the funders for the present study and, if applicable, for the original study on which the present article is based ( <b>Page 14</b> ) |
|---------|----|----------------------------------------------------------------------------------------------------------------------------------------------------------------------------------|

\*Give information separately for cases and controls in case-control studies and, if applicable, for exposed and unexposed groups in cohort and cross-sectional studies.

**Note:** An Explanation and Elaboration article discusses each checklist item and gives methodological background and published examples of transparent reporting. The STROBE checklist is best used in conjunction with this article (freely available on the Web sites of PLoS Medicine at <http://www.plosmedicine.org/>, Annals of Internal Medicine at <http://www.annals.org/>, and Epidemiology at <http://www.epidem.com/>). Information on the STROBE Initiative is available at [www.strobe-statement.org](http://www.strobe-statement.org).

# BMJ Open

## Retrospective analysis of the national impact of industrial action by English junior doctors in 2016

|                                 |                                                                                                                                                                                                                                                                                                                 |
|---------------------------------|-----------------------------------------------------------------------------------------------------------------------------------------------------------------------------------------------------------------------------------------------------------------------------------------------------------------|
| Journal:                        | <i>BMJ Open</i>                                                                                                                                                                                                                                                                                                 |
| Manuscript ID                   | bmjopen-2017-019319.R1                                                                                                                                                                                                                                                                                          |
| Article Type:                   | Research                                                                                                                                                                                                                                                                                                        |
| Date Submitted by the Author:   | 17-Oct-2017                                                                                                                                                                                                                                                                                                     |
| Complete List of Authors:       | Furnivall, Daniel; Imperial College London, Department of Surgery and Cancer; Imperial College London, Dr Foster Unit, Department of Primary Care and Public health<br>Bottle, Alex; Imperial College, Primary Care and Social Medicine<br>Aylin, Paul; Imperial College London, Epidemiology and Public Health |
| <b>Primary Subject Heading</b>: | Health services research                                                                                                                                                                                                                                                                                        |
| Secondary Subject Heading:      | Ethics, Health informatics, Health policy                                                                                                                                                                                                                                                                       |
| Keywords:                       | ACCIDENT & EMERGENCY MEDICINE, NHS, Junior Doctors, Strikes, industrial action, outpatient                                                                                                                                                                                                                      |
|                                 |                                                                                                                                                                                                                                                                                                                 |

SCHOLARONE™  
Manuscripts

**Retrospective analysis of the national impact of industrial action by English junior doctors in 2016.**

Daniel Furnivall, Alex Bottle, Paul Aylin

**Author Details**

Mr Daniel Furnivall, research assistant<sup>1,2</sup>, Dr Alex Bottle, reader in medical statistics<sup>1</sup>, Prof Paul Aylin, professor of epidemiology and public health<sup>1</sup>

1. Dr Foster Unit, Department of Primary Care and Public Health, Imperial College London, 3 Dorset Rise, London, EC4Y 8EN
2. Department of Surgery and Cancer, Imperial College London, St Mary's Hospital, Praed Street, London, W2 1NY

**Corresponding author details**

Daniel Furnivall, (+44)7772543820, [d.furnivall@imperial.ac.uk](mailto:d.furnivall@imperial.ac.uk)

## Abstract

**Objectives:** To examine the impacts of the four episodes of industrial action by English junior doctors in early 2016.

**Design:** Descriptive retrospective study of admitted patient care, accident and emergency (A&E) and outpatient activity in English hospitals.

**Setting:** All hospitals across England.

**Participants:** All patients who attended A&E or outpatient appointments, or those who were admitted to hospital during the three week period surrounding each of the four strikes (January 12<sup>th</sup>, February 10<sup>th</sup>, March 9<sup>th</sup>-10<sup>th</sup> and April 26<sup>th</sup>-27<sup>th</sup>, excluding weekends.)

**Main outcome measures:** Raw numbers and percentage changes of outpatient appointments and cancellations, A&E visits, admitted patients and all in-hospital mortality on strike days compared with patient activity on the same weekday in the weeks before and after the strikes.

**Results:** There were 3.4 million admissions, 27 million outpatient appointments and 3.4 million A&E attendances over the four 3-week periods analysed. Across the four strike days, there were 31,651 fewer admissions (-9.1%), 23,895 fewer A&E attendances (-6.8%) and 173,462 fewer outpatient appointments (-6.0%) than expected. Additionally, 101,109 more outpatient appointments were cancelled by hospitals than expected (+52%). The April 26<sup>th</sup>-27<sup>th</sup> strike, where emergency services were also affected, showed the largest impacts on regular service. Mortality did not measurably increase on strike days. Regional analysis showed that services in the Yorkshire and the Humber region were disproportionately more affected by the industrial action.

**Conclusions:** Industrial action by junior doctors during early 2016 caused a significant impact on the provision of healthcare provided by English hospitals. We also observed regional variations in how these strikes affected providers.

### Strengths and limitations of this study

- **Strength:** This is the first UK study which looked at the effects of striking junior doctors, as well as the first to evaluate the impact of withheld in-hospital emergency services (the April 2016 strike was the first ever UK strike to include emergency care)
- **Strength:** This was a large analysis of English hospital administrative data from the 2016 strikes show a significant impact on outpatient appointments, admitted patient care and A&E visits.
- **Limitation:** This work did not include any financial modelling of the impact of industrial action on either the national or the regional level.
- **Limitation:** The study was unable to examine the health impacts on patients who could not attend hospitals due to industrial action. Additionally, qualitative outcomes such as disappointment and inconvenience were not collected.



## Introduction

In each of the first four months of 2016, junior doctors from all specialties in England engaged in industrial action with a series of 24-48 hour strikes, culminating in a two day strike which included the withdrawal of emergency services<sup>1</sup>. The purpose of the action was to protest new contractual changes for all junior doctors brought by the Department of Health (DH) regarding safe working hours and pay<sup>2</sup>. Doctor's strikes in the UK are very rare – before the 2016 strikes, there had been only one, much smaller strike in the previous 40 years (in 2012)<sup>3,4</sup>.

Breaks from routine care patterns offer an important window into the effectiveness of currently established treatment services. During annual meetings of the American Heart Association and the American College of Cardiology, there are significant drops in 30-day mortality among high-risk patients admitted with heart attacks or cardiac failure<sup>5</sup>. Therefore, the 2016 strikes provide an ideal opportunity to evaluate the effectiveness of current systems and locate weaknesses in national responses to staffing shortages.

Metcalfe et al<sup>6</sup> studied strikes among doctors in the USA, Israel, Spain, Croatia, South Africa, India and the UK. Almost all of the strikes they looked at showed little to no effect on patient mortality. In fact, only one (a 20 day long strike of all doctors in a single province in South Africa in 2010) reported increased mortality rates – patients who presented in emergency departments were 67% more likely to die than during a normal period<sup>6</sup>. Ruiz et al<sup>3</sup> analysed the 24-hour strike on 21<sup>st</sup> June 2012 in England, where approximately 8% of doctors in England took part.<sup>7</sup> For their analysis, they used Hospital Episode Statistics (HES), the national hospital administrative database for England's NHS, and compared the week of the strike with the week immediately following and preceding it. Their analysis found an increase in outpatient appointment cancellations, but no significant differences in mortality between strike and non-strike periods.

This current work aimed to examine the impact of the junior doctors' strikes in early 2016 using, Health Episode Statistics (HES), which contains data on NHS activity. This dataset allowed us to investigate trends in the number of admissions (inpatients), outpatient appointments cancellations, Accident and Emergency (A&E) attendances and in-hospital deaths during strike periods and to compare these with the expected numbers based on an average non-strike period.

## Methods

Hospital episode statistics include details of all admissions to NHS Hospitals in England and are collected by the Department of Health. HES data covering all recorded episodes of admitted patient

1  
2  
3 care, outpatient appointments and A&E attendances were extracted for the week of each strike.  
4 Strike action by English junior doctors took place on four occasions throughout early 2016 – January  
5 12<sup>th</sup>, February 10<sup>th</sup>, March 9<sup>th</sup>-10<sup>th</sup> and April 26<sup>th</sup>-27<sup>th</sup>. For comparison with normal operations, we  
6 also extracted all data from the weeks immediately preceding and following each strike. For  
7 simplicity, weekends were excluded from our analysis.  
8  
9

10  
11 Due to the impact upon normal hospital operations and attendance due to the bank holiday on the  
12 week of the 2<sup>nd</sup> of May, the second comparator week was replaced with the week of May 9<sup>th</sup>-13<sup>th</sup> for  
13 the April strike.  
14  
15

16 Each hospital admission is recorded as a “spell” consisting of a number of “consultant episodes,”  
17 which denotes period of care under different consultants during their hospital admission<sup>8</sup>. If the  
18 patient admission includes transfer to other hospitals before they are discharged, the whole period  
19 of care is recorded as a “superspell.” For our analysis of admitted patient care, only the first  
20 “episode” in a superspell of care was used to identify the date of initial admission, so as to avoid  
21 multiple counting.  
22  
23  
24  
25

26 The data from the comparator weeks were averaged into what was assumed to be a “normal” week.  
27 This allowed for comparison with the strike data to provide an indication of the impacts of individual  
28 strikes.  
29  
30  
31

32 Daily totals for A&E attendances, outpatient appointments and hospital admissions were calculated.  
33 Admitted patients were separated into elective and emergency categories using the “admimeth”  
34 method of admission field in HES. Day surgery cases were extracted using the “CLASSPAT” field.  
35  
36

37 Outpatient appointments were analysed using the “attended” field, which includes the following  
38 categories:  
39

40 0 = Not applicable - appointment occurs in the future

41 2 = Appointment cancelled by, or on behalf of, the patient

42 3 = Did not attend - no advance warning given

43 4 = Appointment cancelled or postponed by the health care provider

44 5 = Seen, having attended on time or, if late, before the relevant care professional was ready  
45 to see the patient

46 6 = Arrived late, after the relevant care professional was ready to see the patient, but was seen

47 7 = Did not attend - patient arrived late and could not be seen

48 9 = Not known  
49  
50  
51  
52  
53  
54  
55  
56  
57  
58  
59  
60

This analysis, as with Ruiz et al's analysis of a June 2012 strike<sup>3</sup>, focused primarily on category 4 for cancellations, and categories 5&6 to denote actual attendance of appointments.

To obtain death counts, the discharge method field ("dismeth") was used to capture deaths in hospital. The A&E attendance disposal field ("aeattenddisp") was used to determine which patients died within the A&E department. HES Outpatient data do not have the capability to record deaths during appointments, so these data were not used for this outcome.

Finally, regional analyses were performed on all outpatient, A&E and admitted patient data using provider code data ("procode").

For our analysis, it was assumed that patient counts were described by a Poisson distribution, as all values are discrete non-negative integers. A Chi-squared test was used to evaluate significance for proportions. All  $p$  values < 0.05 were considered statistically significant.

### Patient Involvement

No patients were involved in setting the research question or the outcome measures; nor were they involved in the design and implementation of the study. There are no plans to involve patients in the dissemination of results.

### Results

In total, this study involved the extraction and analysis of 3.4 million admissions, 27 million outpatient appointments and 3.4 million A&E attendances over 12 weeks.

Table 1 shows the impacts of the industrial action of early 2016 upon admitted patient care, outpatient appointments and A&E.

| Strike                                | Tuesday 12th January | Wednesday 10th February | Wednesday 9th-Thursday 10th March | Tuesday 26th-Wednesday April 27th       | Total            |
|---------------------------------------|----------------------|-------------------------|-----------------------------------|-----------------------------------------|------------------|
| <b>Services Withheld</b>              | Routine care only    | Routine care only       | Routine care only                 | All services (including emergency care) |                  |
| <b>Total Admissions</b>               | 53,279               | 54,558                  | 107,243                           | 99,866                                  | 314,946          |
| <b>Change in total admissions</b>     | -4,951 (-8.5%)*      | -2,633 (-4.6%)*         | -5,873 (-5.2%)*                   | -18,194 (-15.4%)*                       | -31,651 (-9.1%)  |
| <b>Emergency admissions</b>           | 20,307               | 21,005                  | 40,908                            | 40,077                                  | 122,297          |
| <b>Change in emergency admissions</b> | -1,313 (-6.1%)*      | -30 (-0.1%)             | -99 (-0.2%)                       | -3,383 (-7.8%)*                         | -4,825 (-3.7%)   |
| <b>Elective admissions</b>            | 32,972               | 33,553                  | 66,335                            | 59,789                                  | 192,649          |
| <b>Change in elective admissions</b>  | -3,638 (-9.9%)*      | -2,603 (-7.2%)*         | -5,775 (-8.0%)*                   | -14,811(-19.9%)*                        | -26,827 (-12.2%) |

|                                                                |                  |                  |                  |                    |                   |
|----------------------------------------------------------------|------------------|------------------|------------------|--------------------|-------------------|
| <b>Day case admissions</b>                                     | 23,455           | 23,664           | 47,286           | 42,734             | 137,139           |
| <b>Change in day case admissions</b>                           | -2,367(-9.2%)*   | -1,809 (-7.1%)*  | -3,863 (-7.6%)*  | -9,846 (-18.7%)*   | -17,885 (-11.5%)  |
| <b>Total outpatient Appointments</b>                           | 470,639          | 439,599          | 871,540          | 881,213            | 2,662,991         |
| <b>Change in total outpatient appointments</b>                 | -14,663 (-3.0%)* | -7,702 (-1.7%)*  | -41,182 (-4.5%)* | -109,915 (-11.1%)* | -173,462 (-6.0%)  |
| <b>Outpatient Appointments completed</b>                       | 352,808          | 333,625          | 658,348          | 651,028            | 1,995,809         |
| <b>Change in outpatient appointments completed</b>             | -29,791 (-7.8%)* | -18,305 (-5.2%)* | -59,692 (-8.3%)* | -134,711 (-17.1%)* | -242,499 (-10.6%) |
| <b>Outpatient appointments cancelled by provider</b>           | 49,967           | 45,222           | 90,272           | 109,383            | 294,844           |
| <b>Change in outpatient appointments cancelled by provider</b> | 17,641 (+54.6%)* | 12,739 (+39.2%)* | 26,906 (+42.5%)* | 43,823 (+66.8%)*   | 101,109 (+52.1%)  |
| <b>A&amp;E total attendances</b>                               | 48,827           | 55,842           | 114,292          | 100,569            | 319,530           |
| <b>Change in A&amp;E total attendances</b>                     | -5,219 (-9.7%)*  | 963 (+1.8%)*     | -2314 (-2.0%)*   | -17,325 (-14.7%)*  | -23,895 (-6.8%)   |
| <b>Emergency admission deaths</b>                              | 616              | 583              | 1011             | 999                | 3,209             |
| <b>Change in emergency admission deaths</b>                    | 16 (+2.7%)       | 24 (+4.3%)       | 40 (+4.1%)       | -40 (-3.8%)        | 40 (+1.3%)        |
| <b>Elective admission deaths</b>                               | 21               | 18               | 30               | 29                 | 98                |
| <b>Change in elective admission deaths</b>                     | 0                | 1 (+5.9%)        | 1 (+3.4%)        | -2 (-6.5%)         | 0                 |
| <b>A&amp;E deaths</b>                                          | 73               | 46               | 127              | 110                | 356               |
| <b>Change in A&amp;E deaths</b>                                | 10 (+15.9%)      | -11 (-19.2%)     | 21 (+19.8%)      | 11 (+11.1%)        | 31 (9.75%)        |
| <b>Total deaths</b>                                            | 710              | 647              | 1,168            | 1,138              | 3,663             |
| <b>Change in total deaths</b>                                  | 26 (+3.8%)       | 14 (+2.2%)       | 62 (+5.6%)       | -31 (-2.7%)        | 71 (2.0%)         |

Table 1- Results of Strike Analyses. Statistical significance at the 5% level as given by the Chi-Squared test is denoted with asterisks. Percentage change vs expected non-strike volumes are shown in brackets.

Figure 1 - Impacts of each of the four strikes on hospital activity across all strikes and types of care

Figure 1 shows the percentage change in A&E visits, admitted patients and outpatient appointments across all four strikes against the average of the chosen comparator weeks.

The largest impacts upon normal operations were seen in the April strike. This is to be expected, as it lasted 48 hours and was also the only instance where emergency care was also withheld.

During the April strike, there was a decrease in total admissions of 18,194 patients compared with the expected volume for that period, which comprised a 7.8% decrease in emergency admissions and a 19.9% decrease in elective admissions. Day cases showed a reduction of 9,846 patients, (18.7%) compared with the comparator weeks.

Furthermore, 109,915 (11.1%) fewer outpatient appointments were scheduled during the strike period than usual and 134,711 (17.1%) fewer outpatient appointments were attended during strike days. This was paired with an increase in provider cancellations of outpatient appointments of 43,823 (+66.8%). Additionally, fewer patients attended A&E during this period, with 17,325 (-14.7%) fewer attendees than expected.

The first strike which occurred (Tuesday January 12<sup>th</sup> 2016) also showed a large and significant (9.6%) decrease in A&E attendance, despite A&E services operating normally during this time. This may be due to significant media attention for this particular strike, due to its historic significance.

Additionally, some providers warned patients to avoid hospitals “unless absolutely necessary”<sup>9</sup>. This effect diminished during the February and March strikes.

*Figure 2 – Volume of provider cancellations by day during the week in which each of the four strikes occurred. Vertical grey lines on the graph represent strike days.*

### Cancellations

Figure 2 shows the impacts of strikes upon the numbers of appointments cancelled or postponed by health care providers. The largest impacts were seen during the January and April strikes, which showed increases of 54.5% and 66.8% compared with expected cancellations. Our analysis found that 101,109 outpatient appointments were cancelled due to strike action in 2016.

### Regional analysis

| Region           | Change in elective admissions (%) | Change in non-elective admissions (%) | Change in outpatient appointments attended (%) | Change in outpatient cancellations (%) | Change in A&E visits (%) |
|------------------|-----------------------------------|---------------------------------------|------------------------------------------------|----------------------------------------|--------------------------|
| North East       | -9.31*                            | -4.69*                                | -6.99*                                         | +41.89*                                | -7.8*                    |
| North West       | -13.3*                            | -1.61*                                | -13.35*                                        | +52.85*                                | -6.24*                   |
| Yorkshire/Humber | -13.59*                           | -4.88*                                | -11.86*                                        | +65.68*                                | -8.05*                   |
| East Midlands    | -13.6*                            | -2.49*                                | -12.62*                                        | +44.69*                                | -7.55*                   |

|                  |         |        |         |         |        |
|------------------|---------|--------|---------|---------|--------|
| West Midlands    | -8.37*  | -5.24* | -8.39*  | +45.41* | -6.53* |
| East of England  | -9.81*  | -3.76* | -9.43*  | +44.89* | -5.93* |
| London           | -17.08* | -3.61* | -13.39* | +68.2*  | -6.79* |
| South East Coast | -14.51* | -5.21* | -10.89* | +67.1*  | -6.97* |
| South Central    | -10.15* | -2.56* | -7.31*  | +22.63* | -7.74* |
| South West       | -11.59* | -4.02* | -10.88* | +52.02* | -7.29* |

Table 2 - Regional analyses of strike impacts. Statistical significance at the 5% level as given by the Chi-Squared test is denoted with asterisks

Table 2 shows the differential regional impacts of the strikes on both outpatient appointments and cancellations. This analysis shows particularly large increases in outpatient cancellations by healthcare providers in London, the south east coast and Yorkshire/the Humber. These areas also showed large decreases in the number of overall outpatient appointments attended. The East Midlands also showed a large decrease in overall appointment attendance. The south central region showed a much smaller increase in cancellations than others.

The table also shows the regional variation in admitted patient care during strike periods, separated by elective admissions (including day cases) and non-elective emergency admissions. As with outpatient appointments, the most prominently affected regions by the strikes for elective admissions were Yorkshire and the Humber, London and the East Midlands, which all showed sizable drops in recorded elective admissions. For emergency (i.e. non-elective) admissions, recorded impacts were smaller and seemed to affect different areas, such as the South West and West Midlands.

Our analysis found an average reduction in A&E patient volume of 7.09% across all strike days. The largest regional drops in volume were found in Yorkshire and the Humber (8.05%) and the North East (7.8%). Impacts were more limited in the East of England (5.93%) and the North West (6.24%).

## Discussion

We found that industrial action by junior doctors in 2016 resulted in total 31,651 fewer admissions, 173,462 fewer outpatient appointments and 23,895 fewer A&E attendances compared with expected volumes from similar weeks. Large effects were seen in the numbers of cancelled outpatient appointments by healthcare providers - providers cancelled a total of 294,844 appointments, a 52% increase compared with the expected volume during these periods. The most pronounced effects on NHS operations were seen during the first (January 12<sup>th</sup>) and last (April 26<sup>th</sup>-27<sup>th</sup>) strikes. During all strike days, a total of 3209 patients died in hospital during emergency

1  
2  
3 admissions, 98 during elective admissions and 356 died in A&E. However, numbers of recorded  
4 hospital deaths did not appear to change significantly during the strikes compared with expected  
5 numbers for either admitted patients or A&E, which is in line with what has been seen in most other  
6 studies of striking doctors globally.<sup>6</sup> We found no measurable effect on mortality within the dates  
7 analysed, although deaths due to poor care are likely to have an associated delay. Regional analysis  
8 showed that strikes disproportionately affected London, Yorkshire and the Humber and the East  
9 Midlands for outpatient appointments and elective admissions. Emergency admissions were most  
10 affected in the South West and West Midlands regions. A&E attendance was most affected in the  
11 North East, Yorkshire and the Humber and South Central England. The January 12<sup>th</sup> strike  
12 corresponded with a 9% drop in A&E admissions, despite industrial action not affecting emergency  
13 services. This is noteworthy as it implies many patients may have consciously avoided going to  
14 hospital during this period, perhaps due to intense media coverage of the event and explicit  
15 instructions from some providers to avoid all non-urgent hospital attendances.  
16  
17

18  
19  
20 Our analysis is broadly consistent with similar studies of this type. Prior work by Ruiz et al<sup>3</sup> has  
21 shown the effects of striking doctors on outpatient cancellations by provider. This work replicates  
22 that effect – during the strike on April 26<sup>th</sup>-27<sup>th</sup> 2016, there was an increase in cancellations of 67%  
23 when compared with average figures from the surrounding weeks. As with Ruiz et al<sup>3</sup> and almost  
24 every previous study of this type both nationally and internationally<sup>6</sup>, this work did not find a  
25 significant effect on mortality among either admitted or A&E patients during strike days. This could  
26 be either because there is no effect, or our study did not have enough power to demonstrate an  
27 effect, due to the small study period involved in strike days. It may be the case that during periods of  
28 industrial action, staffing priority is given to critical care, resulting in small differences in mortality  
29 but a poorer patient experience in non-vital care. This has previously been discussed by Metcalfe et  
30 al in their international comparison of the impacts of industrial action by doctors<sup>6</sup> .  
31  
32

33  
34  
35 This is a large national study which was able to analyse the majority of admissions, outpatient  
36 appointments and A&E visits during the 2016 strikes. Hospital episode statistics have previously  
37 been shown to have reasonable accuracy at both outpatient<sup>10</sup> and inpatient<sup>11</sup> levels. Furthermore,  
38 the strike on April 26<sup>th</sup> and 27<sup>th</sup> also demonstrates the first opportunity for researchers in the UK to  
39 investigate the effects of industrial action upon emergency personnel – previous strikes did not  
40 withhold emergency care. During this period, there was a drop in the number of patients attending  
41 A&E of 17,325 (almost 15%) compared with the expected volume for this time period. We found no  
42 evidence of increased mortality during the study period.  
43  
44  
45  
46  
47  
48  
49  
50  
51  
52  
53  
54  
55  
56  
57  
58  
59  
60

1  
2  
3 The weaknesses of this work are predominantly due to what was not investigated – for example, HES  
4 data alone do not allow the investigation of the effects of strikes upon patients who did not attend  
5 A&E during this period. Furthermore, analysis focused only on the weeks where strikes occurred,  
6 which prevented the capture of lagged effects in the immediate aftermath of a strike. The design of  
7 the study ensured that no outcomes were measured at weekends – this is a limitation, partly due to  
8 the lack of measured outcomes but additionally due to the context of the debate over the existence  
9 of a ‘Weekend Effect’ in mortality. Outcomes (especially mortality) proved difficult to measure.  
10 Death counts during strike days were small, and hence lacking in statistical power, and many  
11 patients stayed in hospital for more than a single day. Importantly, other outcomes such as  
12 morbidity, direct financial costs and opportunity costs for both the NHS (through rescheduling  
13 elective operations and other procedures) and patients (taking time off work, childcare costs etc)  
14 were uncaptured. This study also includes no qualitative element, which prevents us from capturing  
15 unrecorded outcomes of strikes, such as disappointment, inconvenience, stress and worry. Finally,  
16 the occurrence of a national bank holiday on the week of the 2<sup>nd</sup> of May meant that patient profiles  
17 were likely to differ between strike and comparator weeks. As such, in our analysis the second  
18 comparator week for the April strike was replaced with data from the week of May 9<sup>th</sup>-13<sup>th</sup> instead.  
19  
20  
21  
22  
23  
24  
25  
26  
27

## 28 **Conclusions**

29  
30  
31 The four junior doctor’s strikes between January-April 2016 resulted in significant negative impacts  
32 upon patient care as measured by hospital activity. Significant increases in outpatient appointment  
33 cancellations by hospitals were paired with decreases in admitted patients and A&E visits. The major  
34 outcome we investigated was mortality, which showed no measurable change. However, this is likely  
35 to be the least sensitive outcome for quality and safety concerns. These findings may also suggest  
36 that NHS Trusts responded effectively to the industrial action by cancelling outpatient appointments  
37 to protect higher-risk services. Future work in this area should focus on how the strikes affected  
38 waiting times and similar quality outcomes. Strike-related morbidity (such as disease progression in  
39 the time between rescheduled operations/appointments) would likely be a fertile avenue for  
40 investigation. Delays will also be likely to have an associated cost burden in terms of worse patient  
41 outcomes and hence costlier treatment, which should be accounted for. Finally, it should be  
42 determined whether quality of care was negatively impacted in the period immediately following  
43 the strikes.  
44  
45  
46  
47  
48  
49  
50  
51  
52  
53  
54  
55  
56  
57  
58  
59  
60



**Contributorship statement**

Study design: Paul Aylin, Daniel Furnivall

Data collection: Daniel Furnivall, Paul Aylin, Alex Bottle

Data analysis and interpretation: Daniel Furnivall, Alex Bottle, Paul Aylin

Drafting the article: Daniel Furnivall

Critical revision of the article: Paul Aylin, Alex Bottle

Final approval of version to be published: Paul Aylin, Alex Bottle, Daniel Furnivall

**Transparency Declaration**

Professor Paul Aylin affirms that this manuscript is an honest, accurate, and transparent account of the study being reported; that no important aspects of the study have been omitted; and that any discrepancies from the study as planned (and, if relevant, registered) have been explained.

**Copyright**

The Corresponding Author has the right to grant on behalf of all authors and does grant on behalf of all authors, a worldwide licence to the Publishers and its licensees in perpetuity, in all forms, formats and media (whether known now or created in the future), to i) publish, reproduce, distribute, display and store the Contribution, ii) translate the Contribution into other languages, create adaptations, reprints, include within collections and create summaries, extracts and/or, abstracts of the Contribution, iii) create any other derivative work(s) based on the Contribution, iv) to exploit all subsidiary rights in the Contribution, v) the inclusion of electronic links from the Contribution to third party material where-ever it may be located; and, vi) licence any third party to do any or all of the above.

**Competing Interests Declaration**

All authors have completed the ICMJE uniform disclosure form at [www.icmje.org/coi\\_disclosure.pdf](http://www.icmje.org/coi_disclosure.pdf) (available on request from the corresponding author) and declare: no support from any organisation for the submitted work; no other relationships or activities that could appear to have influenced the submitted work. PA is principal investigator for The Dr Foster Unit, an academic unit in the Department of Primary Care and Public Health, within the School of Public Health, Imperial College London. The unit receives research funding from Dr Foster Intelligence, an independent health service research organisation (a wholly owned subsidiary of Telstra).

**Funding acknowledgements**

NIHR Programme Grants for Applied Research: RDPSC 79560

1  
2  
3 The Dr Foster Unit is an academic unit in the Department of Primary Care and Public Health, within  
4 the School of Public Health, Imperial College London. The unit receives research funding from the  
5 National Institute of Health Research and Dr Foster Intelligence, an independent health service  
6 research organisation (a wholly owned subsidiary of Telstra). The Dr Foster Unit at Imperial is  
7 affiliated with the National Institute of Health Research (NIHR) Imperial Patient Safety Translational  
8 Research Centre. The NIHR Imperial Patient Safety Translational Centre is a partnership between the  
9 Imperial College Healthcare NHS Trust and Imperial College London. The Department of Primary  
10 Care & Public Health at Imperial College London is grateful for support from the NW London NIHR  
11 Collaboration for Leadership in Applied Health Research & Care (CLAHRC) and the Imperial NIHR  
12 Biomedical Research Centre.  
13  
14  
15  
16  
17  
18  
19  
20  
21

## 22 Ethics

23 The principal investigator has approval from the Secretary of State and the Health Research  
24 Authority under Regulation 5 of the Health Service (Control of Patient Information) Regulations 2002  
25 to hold confidential data and analyse them for research purposes (CAG ref 15/CAG/0005). We have  
26 approval to use them for research and measuring quality of delivery of healthcare, from the London  
27 - South East Ethics Committee (REC ref 15/LO/0824).  
28  
29  
30  
31

## 32 Data Sharing Statement

33 All SAS code used in the study is available upon request from the corresponding author.  
34  
35

## 36 References

- 37 1. Godlee F. Breaking point. *BMJ* 2016; **353**.
- 38 2. Toynbee M, Al-Diwani AA, Clacey J, Broome MR. Should junior doctors strike? *Journal of*  
39 *medical ethics* 2016; **42**(3): 167-70.
- 40 3. Ruiz M, Bottle A, Aylin P. A retrospective study on the impact of the doctors' strike in  
41 England on 21 June 2012. *Journal of the Royal Society of Medicine* 2013: 0141076813490685.
- 42 4. McKay AJ, Majeed A. Junior Doctors in England Strike for the First Time in 40 Years. *The*  
43 *Journal of Ambulatory Care Management* 2016; **39**(2): 178-81.
- 44 5. Jena AB, Prasad V, Goldman DP, Romley J. Mortality and treatment patterns among patients  
45 hospitalized with acute cardiovascular conditions during dates of national cardiology meetings.  
46 *JAMA Internal Medicine* 2015; **175**(2): 237-44.
- 47 6. Metcalfe D, Chowdhury R, Salim A. What are the consequences when doctors strike? *BMJ*  
48 2015; **351**.
- 49 7. Trigg N. Disruption to patients 'more limited than feared'. BBC News. 2012.
- 50 8. Aylin P, Bottle A, Jen MH, Middleton S, Intelligence F. HSMR mortality indicators. *Imperial*  
51 *College Technical Document 26th November 2010*.
- 52 9. NHS. Pennine Acute Hospitals Junior Doctor's National Strike 12 January: Patients advised to  
53 avoid coming to hospital unless absolutely necessary. 2016.  
54  
55  
56  
57  
58  
59  
60

- 1
- 2
- 3 10. Thorn JC, Turner E, Hounscome L, et al. Validation of the Hospital Episode Statistics
- 4 Outpatient Dataset in England. *PharmacoEconomics* 2016; **34**(2): 161-8.
- 5 11. Thorn JC, Turner EL, Hounscome L, et al. Validating the use of Hospital Episode Statistics data
- 6 and comparison of costing methodologies for economic evaluation: an end-of-life case study from
- 7 the Cluster randomised triAl of PSA testing for Prostate cancer (CAP). *BMJ open* 2016; **6**(4): e011063.
- 8
- 9
- 10
- 11
- 12
- 13
- 14
- 15
- 16
- 17
- 18
- 19
- 20
- 21
- 22
- 23
- 24
- 25
- 26
- 27
- 28
- 29
- 30
- 31
- 32
- 33
- 34
- 35
- 36
- 37
- 38
- 39
- 40
- 41
- 42
- 43
- 44
- 45
- 46
- 47
- 48
- 49
- 50
- 51
- 52
- 53
- 54
- 55
- 56
- 57
- 58
- 59
- 60

For peer review only

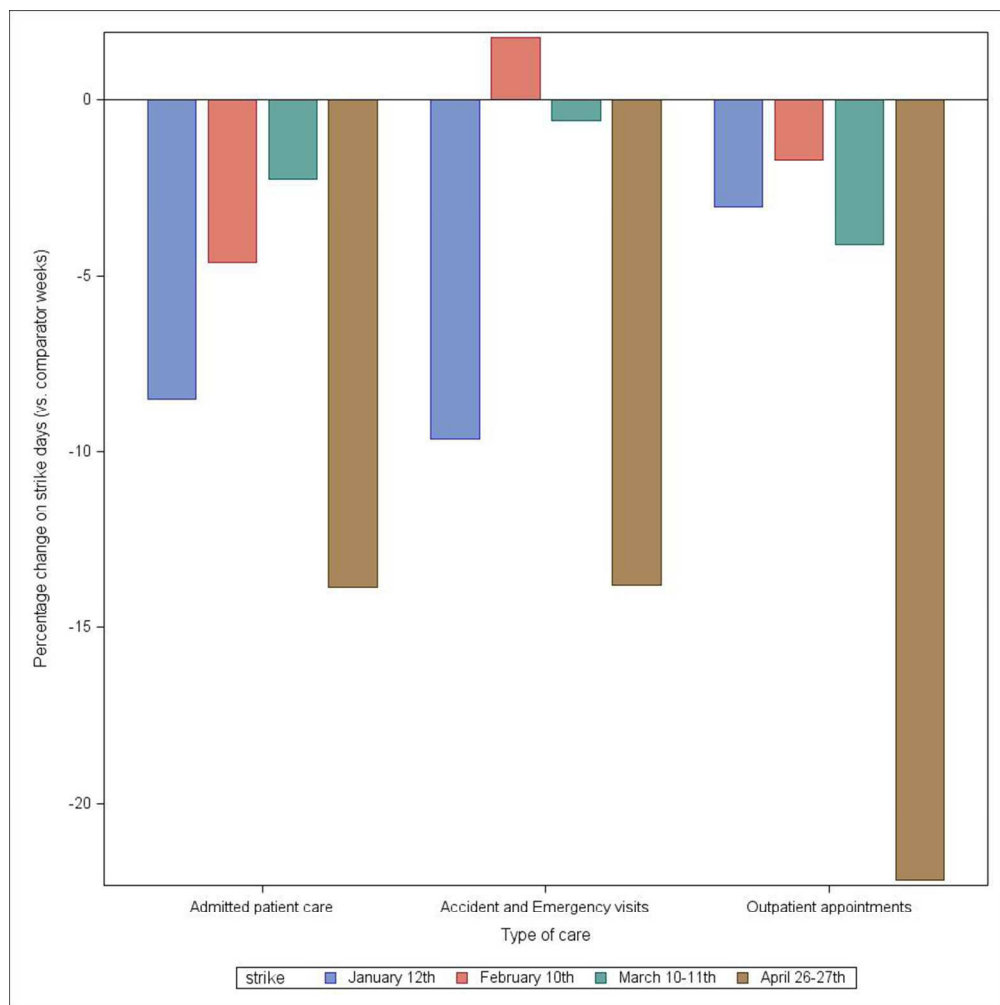

Impacts of each of the four strikes on hospital activity across all strikes and types of care

254x254mm (96 x 96 DPI)

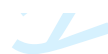

1  
2  
3  
4  
5  
6  
7  
8  
9  
10  
11  
12  
13  
14  
15  
16  
17  
18  
19  
20  
21  
22  
23  
24  
25  
26  
27  
28  
29  
30  
31  
32  
33  
34  
35  
36  
37  
38  
39  
40  
41  
42  
43  
44  
45  
46  
47  
48  
49  
50  
51  
52  
53  
54  
55  
56  
57  
58  
59  
60

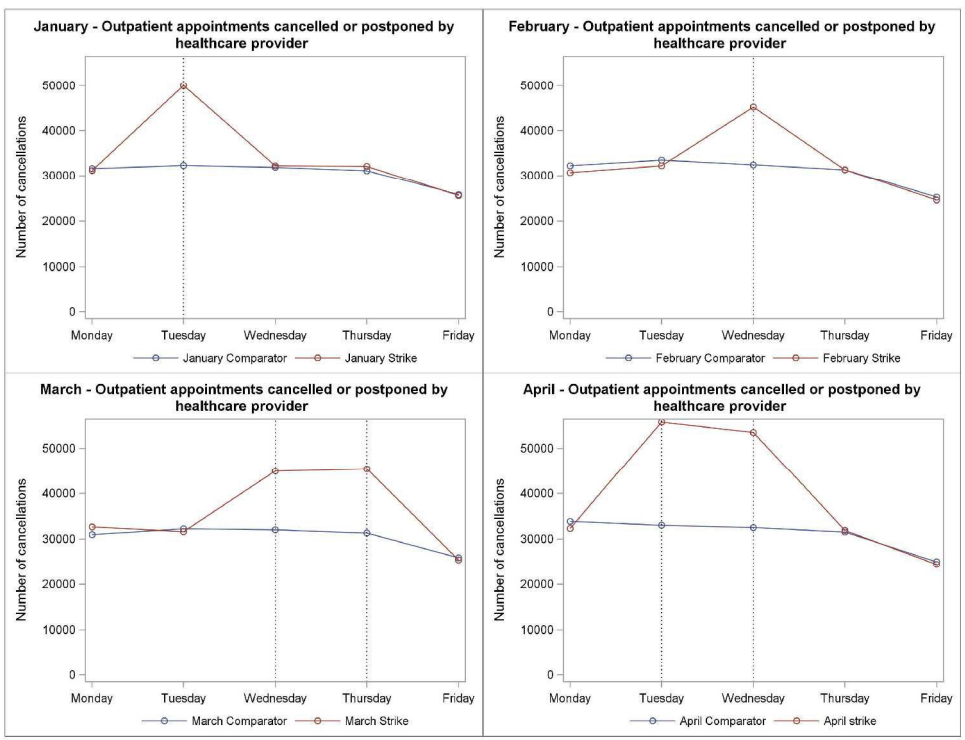

Volume of provider cancellations by day during the week in which each of the four strikes occurred. Vertical grey lines on the graph represent strike days.

279x215mm (300 x 300 DPI)

View only

## STROBE Statement—checklist of items that should be included in reports of observational studies

|                              | Item No | Recommendation                                                                                                                                                                                                                                                                                                                                                                                                                                                                                                                                                                                                                                                                                                            |
|------------------------------|---------|---------------------------------------------------------------------------------------------------------------------------------------------------------------------------------------------------------------------------------------------------------------------------------------------------------------------------------------------------------------------------------------------------------------------------------------------------------------------------------------------------------------------------------------------------------------------------------------------------------------------------------------------------------------------------------------------------------------------------|
| <b>Title and abstract</b>    | 1       | (a) Indicate the study's design with a commonly used term in the title or the abstract ( <b>Page 1</b> )<br>(b) Provide in the abstract an informative and balanced summary of what was done and what was found ( <b>Page 2</b> )                                                                                                                                                                                                                                                                                                                                                                                                                                                                                         |
| <b>Introduction</b>          |         |                                                                                                                                                                                                                                                                                                                                                                                                                                                                                                                                                                                                                                                                                                                           |
| Background/rationale         | 2       | Explain the scientific background and rationale for the investigation being reported ( <b>Pages 2&amp;3</b> )                                                                                                                                                                                                                                                                                                                                                                                                                                                                                                                                                                                                             |
| Objectives                   | 3       | State specific objectives, including any prespecified hypotheses ( <b>Centre of page 3</b> )                                                                                                                                                                                                                                                                                                                                                                                                                                                                                                                                                                                                                              |
| <b>Methods</b>               |         |                                                                                                                                                                                                                                                                                                                                                                                                                                                                                                                                                                                                                                                                                                                           |
| Study design                 | 4       | Present key elements of study design early in the paper ( <b>Pages 3&amp;4</b> )                                                                                                                                                                                                                                                                                                                                                                                                                                                                                                                                                                                                                                          |
| Setting                      | 5       | Describe the setting, locations, and relevant dates, including periods of recruitment, exposure, follow-up, and data collection ( <b>Page 4</b> )                                                                                                                                                                                                                                                                                                                                                                                                                                                                                                                                                                         |
| Participants                 | 6       | (a) <i>Cohort study</i> —Give the eligibility criteria, and the sources and methods of selection of participants. Describe methods of follow-up<br><i>Case-control study</i> —Give the eligibility criteria, and the sources and methods of case ascertainment and control selection. Give the rationale for the choice of cases and controls<br><i>Cross-sectional study</i> —Give the eligibility criteria, and the sources and methods of selection of participants ( <b>Pages 4&amp;5</b> )<br>(b) <i>Cohort study</i> —For matched studies, give matching criteria and number of exposed and unexposed<br><i>Case-control study</i> —For matched studies, give matching criteria and the number of controls per case |
| Variables                    | 7       | Clearly define all outcomes, exposures, predictors, potential confounders, and effect modifiers. Give diagnostic criteria, if applicable ( <b>Page 5&amp;6</b> )                                                                                                                                                                                                                                                                                                                                                                                                                                                                                                                                                          |
| Data sources/<br>measurement | 8*      | For each variable of interest, give sources of data and details of methods of assessment (measurement). Describe comparability of assessment methods if there is more than one group ( <b>Page 3</b> )                                                                                                                                                                                                                                                                                                                                                                                                                                                                                                                    |
| Bias                         | 9       | Describe any efforts to address potential sources of bias ( <b>Top of page 4</b> )                                                                                                                                                                                                                                                                                                                                                                                                                                                                                                                                                                                                                                        |
| Study size                   | 10      | Explain how the study size was arrived at ( <b>N/A - entire population</b> )                                                                                                                                                                                                                                                                                                                                                                                                                                                                                                                                                                                                                                              |
| Quantitative variables       | 11      | Explain how quantitative variables were handled in the analyses. If applicable, describe which groupings were chosen and why ( <b>N/A – counts only</b> )                                                                                                                                                                                                                                                                                                                                                                                                                                                                                                                                                                 |
| Statistical methods          | 12      | (a) Describe all statistical methods, including those used to control for confounding ( <b>page 4,5,6</b> )<br>(b) Describe any methods used to examine subgroups and interactions ( <b>Pages 5+10</b> )<br>(c) Explain how missing data were addressed ( <b>N/A</b> )<br>(d) <i>Cohort study</i> —If applicable, explain how loss to follow-up was addressed<br><i>Case-control study</i> —If applicable, explain how matching of cases and controls was addressed<br><i>Cross-sectional study</i> —If applicable, describe analytical methods taking account of sampling strategy ( <b>Pages 3&amp;4</b> )<br>(e) Describe any sensitivity analyses ( <b>N/A</b> )                                                      |

Continued on next page

**Results**

|                  |     |                                                                                                                                                                                                                                                                                                                                                                                                                                      |
|------------------|-----|--------------------------------------------------------------------------------------------------------------------------------------------------------------------------------------------------------------------------------------------------------------------------------------------------------------------------------------------------------------------------------------------------------------------------------------|
| Participants     | 13* | (a) Report numbers of individuals at each stage of study—eg numbers potentially eligible, examined for eligibility, confirmed eligible, included in the study, completing follow-up, and analysed ( <b>Pages 5&amp;6</b> )<br>(b) Give reasons for non-participation at each stage (N/A)<br>(c) Consider use of a flow diagram (N/A)                                                                                                 |
| Descriptive data | 14* | (a) Give characteristics of study participants (eg demographic, clinical, social) and information on exposures and potential confounders ( <b>N/A – entire population</b> )<br>(b) Indicate number of participants with missing data for each variable of interest ( <b>N/A</b> )<br>(c) <i>Cohort study</i> —Summarise follow-up time (eg, average and total amount)                                                                |
| Outcome data     | 15* | <i>Cohort study</i> —Report numbers of outcome events or summary measures over time<br><i>Case-control study</i> —Report numbers in each exposure category, or summary measures of exposure<br><i>Cross-sectional study</i> —Report numbers of outcome events or summary measures ( <b>Pages 5&amp;6</b> )                                                                                                                           |
| Main results     | 16  | (a) Give unadjusted estimates and, if applicable, confounder-adjusted estimates and their precision (eg, 95% confidence interval). Make clear which confounders were adjusted for and why they were included ( <b>Page 5,6,10</b> )<br>(b) Report category boundaries when continuous variables were categorized<br>(c) If relevant, consider translating estimates of relative risk into absolute risk for a meaningful time period |
| Other analyses   | 17  | Report other analyses done—eg analyses of subgroups and interactions, and sensitivity analyses ( <b>Page 10 – regional analysis</b> )                                                                                                                                                                                                                                                                                                |

**Discussion**

|                  |    |                                                                                                                                                                                               |
|------------------|----|-----------------------------------------------------------------------------------------------------------------------------------------------------------------------------------------------|
| Key results      | 18 | Summarise key results with reference to study objectives ( <b>Page 11</b> )                                                                                                                   |
| Limitations      | 19 | Discuss limitations of the study, taking into account sources of potential bias or imprecision. Discuss both direction and magnitude of any potential bias ( <b>Page 12</b> )                 |
| Interpretation   | 20 | Give a cautious overall interpretation of results considering objectives, limitations, multiplicity of analyses, results from similar studies, and other relevant evidence ( <b>Page 12</b> ) |
| Generalisability | 21 | Discuss the generalisability (external validity) of the study results ( <b>Page 12</b> )                                                                                                      |

**Other information**

|         |    |                                                                                                                                                                                  |
|---------|----|----------------------------------------------------------------------------------------------------------------------------------------------------------------------------------|
| Funding | 22 | Give the source of funding and the role of the funders for the present study and, if applicable, for the original study on which the present article is based ( <b>Page 14</b> ) |
|---------|----|----------------------------------------------------------------------------------------------------------------------------------------------------------------------------------|

\*Give information separately for cases and controls in case-control studies and, if applicable, for exposed and unexposed groups in cohort and cross-sectional studies.

**Note:** An Explanation and Elaboration article discusses each checklist item and gives methodological background and published examples of transparent reporting. The STROBE checklist is best used in conjunction with this article (freely available on the Web sites of PLoS Medicine at <http://www.plosmedicine.org/>, Annals of Internal Medicine at <http://www.annals.org/>, and Epidemiology at <http://www.epidem.com/>). Information on the STROBE Initiative is available at [www.strobe-statement.org](http://www.strobe-statement.org).

# BMJ Open

## Retrospective analysis of the national impact of industrial action by English junior doctors in 2016

|                                 |                                                                                                                                                                                                                                                                                                                 |
|---------------------------------|-----------------------------------------------------------------------------------------------------------------------------------------------------------------------------------------------------------------------------------------------------------------------------------------------------------------|
| Journal:                        | <i>BMJ Open</i>                                                                                                                                                                                                                                                                                                 |
| Manuscript ID                   | bmjopen-2017-019319.R2                                                                                                                                                                                                                                                                                          |
| Article Type:                   | Research                                                                                                                                                                                                                                                                                                        |
| Date Submitted by the Author:   | 22-Nov-2017                                                                                                                                                                                                                                                                                                     |
| Complete List of Authors:       | Furnivall, Daniel; Imperial College London, Department of Surgery and Cancer; Imperial College London, Dr Foster Unit, Department of Primary Care and Public health<br>Bottle, Alex; Imperial College, Primary Care and Social Medicine<br>Aylin, Paul; Imperial College London, Epidemiology and Public Health |
| <b>Primary Subject Heading</b>: | Health services research                                                                                                                                                                                                                                                                                        |
| Secondary Subject Heading:      | Ethics, Health informatics, Health policy                                                                                                                                                                                                                                                                       |
| Keywords:                       | ACCIDENT & EMERGENCY MEDICINE, NHS, Junior Doctors, Strikes, industrial action, outpatient                                                                                                                                                                                                                      |
|                                 |                                                                                                                                                                                                                                                                                                                 |

SCHOLARONE™  
Manuscripts



**Retrospective analysis of the national impact of industrial action by English junior doctors in 2016.**

Daniel Furnivall, Alex Bottle, Paul Aylin

**Author Details**

Mr Daniel Furnivall, research assistant<sup>1,2</sup>, Dr Alex Bottle, reader in medical statistics<sup>1</sup>, Prof Paul Aylin, professor of epidemiology and public health<sup>1</sup>

1. Dr Foster Unit, Department of Primary Care and Public Health, Imperial College London, 3 Dorset Rise, London, EC4Y 8EN
2. Department of Surgery and Cancer, Imperial College London, St Mary's Hospital, Praed Street, London, W2 1NY

**Corresponding author details**

Daniel Furnivall, (+44)7772543820, [d.furnivall@imperial.ac.uk](mailto:d.furnivall@imperial.ac.uk)

## Abstract

**Objectives:** To examine the impacts of the four episodes of industrial action by English junior doctors in early 2016.

**Design:** Descriptive retrospective study of admitted patient care, accident and emergency (A&E) and outpatient activity in English hospitals.

**Setting:** All hospitals across England.

**Participants:** All patients who attended A&E or outpatient appointments, or those who were admitted to hospital during the three week period surrounding each of the four strikes (January 12<sup>th</sup>, February 10<sup>th</sup>, March 9<sup>th</sup>-10<sup>th</sup> and April 26<sup>th</sup>-27<sup>th</sup>, excluding weekends.)

**Main outcome measures:** Raw numbers and percentage changes of outpatient appointments and cancellations, A&E visits, admitted patients and all in-hospital mortality on strike days compared with patient activity on the same weekday in the weeks before and after the strikes.

**Results:** There were 3.4 million admissions, 27 million outpatient appointments and 3.4 million A&E attendances over the four 3-week periods analysed. Across the four strike days, there were 31,651 fewer admissions (-9.1%), 23,895 fewer A&E attendances (-6.8%) and 173,462 fewer outpatient appointments (-6.0%) than expected. Additionally, 101,109 more outpatient appointments were cancelled by hospitals than expected (+52%). The April 26<sup>th</sup>-27<sup>th</sup> strike, where emergency services were also affected, showed the largest impacts on regular service. Mortality did not measurably increase on strike days. Regional analysis showed that services in the Yorkshire and the Humber region were disproportionately more affected by the industrial action.

**Conclusions:** Industrial action by junior doctors during early 2016 caused a significant impact on the provision of healthcare provided by English hospitals. We also observed regional variations in how these strikes affected providers.

### Strengths and limitations of this study

- **Strength:** This is the first UK study which looked at the effects of striking junior doctors, as well as the first to evaluate the impact of withheld in-hospital emergency services (the April 2016 strike was the first ever UK strike to include emergency care)
- **Strength:** This was a large analysis of English hospital administrative data from the 2016 strikes show a significant impact on outpatient appointments, admitted patient care and A&E visits.
- **Limitation:** This work did not include any financial modelling of the impact of industrial action on either the national or the regional level.
- **Limitation:** The study was unable to examine the health impacts on patients who could not attend hospitals due to industrial action. Additionally, qualitative outcomes such as disappointment and inconvenience were not collected.

## Introduction

In each of the first four months of 2016, junior doctors from all specialties in England engaged in industrial action with a series of 24-48 hour strikes, culminating in a two day strike which included the withdrawal of emergency services<sup>1</sup>. The purpose of the action was to protest new contractual changes for all junior doctors brought by the Department of Health (DH) regarding safe working hours and pay<sup>2</sup>. Doctor's strikes in the UK are very rare – before the 2016 strikes, there had been only one, much smaller strike in the previous 40 years (in 2012)<sup>3,4</sup>.

Breaks from routine care patterns offer an important window into the effectiveness of currently established treatment services. During annual meetings of the American Heart Association and the American College of Cardiology, there are significant drops in 30-day mortality among high-risk patients admitted with heart attacks or cardiac failure<sup>5</sup>. Therefore, the 2016 strikes provide an ideal opportunity to evaluate the effectiveness of current systems and locate weaknesses in national responses to staffing shortages.

Metcalfe et al<sup>6</sup> studied strikes among doctors in the USA, Israel, Spain, Croatia, South Africa, India and the UK. Almost all of the strikes they looked at showed little to no effect on patient mortality. In fact, only one (a 20 day long strike of all doctors in a single province in South Africa in 2010) reported increased mortality rates – patients who presented in emergency departments were 67% more likely to die than during a normal period<sup>6</sup>. Ruiz et al<sup>3</sup> analysed the 24-hour strike on 21<sup>st</sup> June 2012 in England, where approximately 8% of doctors in England took part.<sup>7</sup> For their analysis, they used Hospital Episode Statistics (HES), the national hospital administrative database for England's NHS, and compared the week of the strike with the week immediately following and preceding it. Their analysis found an increase in outpatient appointment cancellations, but no significant differences in mortality between strike and non-strike periods.

This current work aimed to examine the impact of the junior doctors' strikes in early 2016 using, Health Episode Statistics (HES), which contains data on NHS activity. This dataset allowed us to investigate trends in the number of admissions (inpatients), outpatient appointments cancellations, Accident and Emergency (A&E) attendances and in-hospital deaths during strike periods and to compare these with the expected numbers based on an average non-strike period.

## Methods

Hospital episode statistics include details of all admissions to NHS Hospitals in England and are collected by the Department of Health. HES data covering all recorded episodes of admitted patient

1  
2  
3 care, outpatient appointments and A&E attendances were extracted for the week of each strike.  
4 Strike action by English junior doctors took place on four occasions throughout early 2016 – January  
5 12<sup>th</sup>, February 10<sup>th</sup>, March 9<sup>th</sup>-10<sup>th</sup> and April 26<sup>th</sup>-27<sup>th</sup>. For comparison with normal operations, we  
6 also extracted all data from the weeks immediately preceding and following each strike. For  
7 simplicity, weekends were excluded from our analysis.  
8  
9

10  
11 Due to the impact upon normal hospital operations and attendance due to the bank holiday on the  
12 week of the 2<sup>nd</sup> of May, the second comparator week was replaced with the week of May 9<sup>th</sup>-13<sup>th</sup> for  
13 the April strike.  
14  
15

16 Each hospital admission is recorded as a “spell” consisting of a number of “consultant episodes,”  
17 which denotes period of care under different consultants during their hospital admission<sup>8</sup>. If the  
18 patient admission includes transfer to other hospitals before they are discharged, the whole period  
19 of care is recorded as a “superspell.” For our analysis of admitted patient care, only the first  
20 “episode” in a superspell of care was used to identify the date of initial admission, so as to avoid  
21 multiple counting.  
22  
23  
24  
25

26 The data from the comparator weeks were averaged into what was assumed to be a “normal” week.  
27 This allowed for comparison with the strike data to provide an indication of the impacts of individual  
28 strikes.  
29  
30  
31

32 Daily totals for A&E attendances, outpatient appointments and hospital admissions were calculated.  
33 Admitted patients were separated into elective and emergency categories using the “admimeth”  
34 method of admission field in HES. Day surgery cases were extracted using the “CLASSPAT” field.  
35  
36

37 Outpatient appointments were analysed using the “attended” field, which includes the following  
38 categories:  
39

40 0 = Not applicable - appointment occurs in the future

41 2 = Appointment cancelled by, or on behalf of, the patient

42 3 = Did not attend - no advance warning given

43 4 = Appointment cancelled or postponed by the health care provider

44 5 = Seen, having attended on time or, if late, before the relevant care professional was ready  
45 to see the patient

46 6 = Arrived late, after the relevant care professional was ready to see the patient, but was seen

47 7 = Did not attend - patient arrived late and could not be seen

48 9 = Not known  
49  
50  
51  
52  
53  
54  
55  
56  
57  
58  
59  
60

This analysis, as with Ruiz et al's analysis of a June 2012 strike<sup>3</sup>, focused primarily on category 4 for cancellations, and categories 5&6 to denote actual attendance of appointments.

To obtain death counts, the discharge method field ("dismeth") was used to capture deaths in hospital. The A&E attendance disposal field ("aeattenddisp") was used to determine which patients died within the A&E department. HES Outpatient data do not have the capability to record deaths during appointments, so these data were not used for this outcome.

Finally, regional analyses were performed on all outpatient, A&E and admitted patient data using provider code data ("procode").

For our analysis, it was assumed that patient counts were described by a Poisson distribution, as all values are discrete non-negative integers. A Chi-squared test was used to evaluate significance for proportions. All  $p$  values < 0.05 were considered statistically significant.

### Patient Involvement

No patients were involved in setting the research question or the outcome measures; nor were they involved in the design and implementation of the study. There are no plans to involve patients in the dissemination of results.

### Results

In total, this study involved the extraction and analysis of 3.4 million admissions, 27 million outpatient appointments and 3.4 million A&E attendances over 12 weeks.

Table 1 shows the impacts of the industrial action of early 2016 upon admitted patient care, outpatient appointments and A&E.

| Strike                                | Tuesday 12th January | Wednesday 10th February | Wednesday 9th-Thursday 10th March | Tuesday 26th-Wednesday April 27th       | Total            |
|---------------------------------------|----------------------|-------------------------|-----------------------------------|-----------------------------------------|------------------|
| <b>Services Withheld</b>              | Routine care only    | Routine care only       | Routine care only                 | All services (including emergency care) |                  |
| <b>Total Admissions</b>               | 53,279               | 54,558                  | 107,243                           | 99,866                                  | 314,946          |
| <b>Change in total admissions</b>     | -4,951 (-8.5%)*      | -2,633 (-4.6%)*         | -5,873 (-5.2%)*                   | -18,194 (-15.4%)*                       | -31,651 (-9.1%)  |
| <b>Emergency admissions</b>           | 20,307               | 21,005                  | 40,908                            | 40,077                                  | 122,297          |
| <b>Change in emergency admissions</b> | -1,313 (-6.1%)*      | -30 (-0.1%)             | -99 (-0.2%)                       | -3,383 (-7.8%)*                         | -4,825 (-3.7%)   |
| <b>Elective admissions</b>            | 32,972               | 33,553                  | 66,335                            | 59,789                                  | 192,649          |
| <b>Change in elective admissions</b>  | -3,638 (-9.9%)*      | -2,603 (-7.2%)*         | -5,775 (-8.0%)*                   | -14,811(-19.9%)*                        | -26,827 (-12.2%) |

|                                                         |                  |                  |                  |                    |                   |
|---------------------------------------------------------|------------------|------------------|------------------|--------------------|-------------------|
| Day case admissions                                     | 23,455           | 23,664           | 47,286           | 42,734             | 137,139           |
| Change in day case admissions                           | -2,367(-9.2%)*   | -1,809 (-7.1%)*  | -3,863 (-7.6%)*  | -9,846 (-18.7%)*   | -17,885 (-11.5%)  |
| Total outpatient Appointments                           | 470,639          | 439,599          | 871,540          | 881,213            | 2,662,991         |
| Change in total outpatient appointments                 | -14,663 (-3.0%)* | -7,702 (-1.7%)*  | -41,182 (-4.5%)* | -109,915 (-11.1%)* | -173,462 (-6.0%)  |
| Outpatient Appointments completed                       | 352,808          | 333,625          | 658,348          | 651,028            | 1,995,809         |
| Change in outpatient appointments completed             | -29,791 (-7.8%)* | -18,305 (-5.2%)* | -59,692 (-8.3%)* | -134,711 (-17.1%)* | -242,499 (-10.6%) |
| Outpatient appointments cancelled by provider           | 49,967           | 45,222           | 90,272           | 109,383            | 294,844           |
| Change in outpatient appointments cancelled by provider | 17,641 (+54.6%)* | 12,739 (+39.2%)* | 26,906 (+42.5%)* | 43,823 (+66.8%)*   | 101,109 (+52.1%)  |
| A&E total attendances                                   | 48,827           | 55,842           | 114,292          | 100,569            | 319,530           |
| Change in A&E total attendances                         | -5,219 (-9.7%)*  | 963 (+1.8%)*     | -2314 (-2.0%)*   | -17,325 (-14.7%)*  | -23,895 (-6.8%)   |
| Emergency admission deaths                              | 616              | 583              | 1011             | 999                | 3,209             |
| Change in emergency admission deaths                    | 16 (+2.7%)       | 24 (+4.3%)       | 40 (+4.1%)       | -40 (-3.8%)        | 40 (+1.3%)        |
| Elective admission deaths                               | 21               | 18               | 30               | 29                 | 98                |
| Change in elective admission deaths                     | 0                | 1 (+5.9%)        | 1 (+3.4%)        | -2 (-6.5%)         | 0                 |
| A&E deaths                                              | 73               | 46               | 127              | 110                | 356               |
| Change in A&E deaths                                    | 10 (+15.9%)      | -11 (-19.2%)     | 21 (+19.8%)      | 11 (+11.1%)        | 31 (9.75%)        |
| Total deaths                                            | 710              | 647              | 1,168            | 1,138              | 3,663             |
| Change in total deaths                                  | 26 (+3.8%)       | 14 (+2.2%)       | 62 (+5.6%)       | -31 (-2.7%)        | 71 (2.0%)         |

Table 1- Results of Strike Analyses. Statistical significance at the 5% level as given by the Chi-Squared test is denoted with asterisks. Percentage change vs expected non-strike volumes are shown in brackets.

<Figure 1>

Figure 1 - Impacts of each of the four strikes on hospital activity across all strikes and types of care

Figure 1 shows the percentage change in A&E visits, admitted patients and outpatient appointments across all four strikes against the average of the chosen comparator weeks.

The largest impacts upon normal operations were seen in the April strike. This is to be expected, as it lasted 48 hours and was also the only instance where emergency care was also withheld.

During the April strike, there was a decrease in total admissions of 18,194 patients compared with the expected volume for that period, which comprised a 7.8% decrease in emergency admissions and a 19.9% decrease in elective admissions. Day cases showed a reduction of 9,846 patients, (18.7%) compared with the comparator weeks.

Furthermore, 109,915 (11.1%) fewer outpatient appointments were scheduled during the strike period than usual and 134,711 (17.1%) fewer outpatient appointments were attended during strike days. This was paired with an increase in provider cancellations of outpatient appointments of 43,823 (+66.8%). Additionally, fewer patients attended A&E during this period, with 17,325 (-14.7%) fewer attendees than expected.

The first strike which occurred (Tuesday January 12<sup>th</sup> 2016) also showed a large and significant (9.6%) decrease in A&E attendance, despite A&E services operating normally during this time. This may be due to significant media attention for this particular strike, due to its historic significance.

Additionally, some providers warned patients to avoid hospitals “unless absolutely necessary”<sup>9</sup>. This effect diminished during the February and March strikes.

<Figure 2>

*Figure 2 – Volume of provider cancellations by day during the week in which each of the four strikes occurred. Vertical grey lines on the graph represent strike days.*

### Cancellations

Figure 2 shows the impacts of strikes upon the numbers of appointments cancelled or postponed by health care providers. The largest impacts were seen during the January and April strikes, which showed increases of 54.5% and 66.8% compared with expected cancellations. Our analysis found that 101,109 outpatient appointments were cancelled due to strike action in 2016.

### Regional analysis

| Region           | Change in elective admissions (%) | Change in non-elective admissions (%) | Change in outpatient appointments attended (%) | Change in outpatient cancellations (%) | Change in A&E visits (%) |
|------------------|-----------------------------------|---------------------------------------|------------------------------------------------|----------------------------------------|--------------------------|
| North East       | -9.31*                            | -4.69*                                | -6.99*                                         | +41.89*                                | -7.8*                    |
| North West       | -13.3*                            | -1.61*                                | -13.35*                                        | +52.85*                                | -6.24*                   |
| Yorkshire/Humber | -13.59*                           | -4.88*                                | -11.86*                                        | +65.68*                                | -8.05*                   |
| East Midlands    | -13.6*                            | -2.49*                                | -12.62*                                        | +44.69*                                | -7.55*                   |

|                  |         |        |         |         |        |
|------------------|---------|--------|---------|---------|--------|
| West Midlands    | -8.37*  | -5.24* | -8.39*  | +45.41* | -6.53* |
| East of England  | -9.81*  | -3.76* | -9.43*  | +44.89* | -5.93* |
| London           | -17.08* | -3.61* | -13.39* | +68.2*  | -6.79* |
| South East Coast | -14.51* | -5.21* | -10.89* | +67.1*  | -6.97* |
| South Central    | -10.15* | -2.56* | -7.31*  | +22.63* | -7.74* |
| South West       | -11.59* | -4.02* | -10.88* | +52.02* | -7.29* |

Table 2 - Regional analyses of strike impacts. Statistical significance at the 5% level as given by the Chi-Squared test is denoted with asterisks

Table 2 shows the differential regional impacts of the strikes on both outpatient appointments and cancellations. This analysis shows particularly large increases in outpatient cancellations by healthcare providers in London, the south east coast and Yorkshire/the Humber. These areas also showed large decreases in the number of overall outpatient appointments attended. The East Midlands also showed a large decrease in overall appointment attendance. The south central region showed a much smaller increase in cancellations than others.

The table also shows the regional variation in admitted patient care during strike periods, separated by elective admissions (including day cases) and non-elective emergency admissions. As with outpatient appointments, the most prominently affected regions by the strikes for elective admissions were Yorkshire and the Humber, London and the East Midlands, which all showed sizable drops in recorded elective admissions. For emergency (i.e. non-elective) admissions, recorded impacts were smaller and seemed to affect different areas, such as the South West and West Midlands.

Our analysis found an average reduction in A&E patient volume of 7.09% across all strike days. The largest regional drops in volume were found in Yorkshire and the Humber (8.05%) and the North East (7.8%). Impacts were more limited in the East of England (5.93%) and the North West (6.24%).

## Discussion

We found that industrial action by junior doctors in 2016 resulted in total 31,651 fewer admissions, 173,462 fewer outpatient appointments and 23,895 fewer A&E attendances compared with expected volumes from similar weeks. Large effects were seen in the numbers of cancelled outpatient appointments by healthcare providers - providers cancelled a total of 294,844 appointments, a 52% increase compared with the expected volume during these periods. The most pronounced effects on NHS operations were seen during the first (January 12<sup>th</sup>) and last (April 26<sup>th</sup>-27<sup>th</sup>) strikes. During all strike days, a total of 3209 patients died in hospital during emergency



1  
2  
3 admissions, 98 during elective admissions and 356 died in A&E. However, numbers of recorded  
4 hospital deaths did not appear to change significantly during the strikes compared with expected  
5 numbers for either admitted patients or A&E, which is in line with what has been seen in most other  
6 studies of striking doctors globally.<sup>6</sup> We found no measurable effect on mortality within the dates  
7 analysed, although deaths due to poor care are likely to have an associated delay. Regional analysis  
8 showed that strikes disproportionately affected London, Yorkshire and the Humber and the East  
9 Midlands for outpatient appointments and elective admissions. Emergency admissions were most  
10 affected in the South West and West Midlands regions. A&E attendance was most affected in the  
11 North East, Yorkshire and the Humber and South Central England. The January 12<sup>th</sup> strike  
12 corresponded with a 9% drop in A&E admissions, despite industrial action not affecting emergency  
13 services. This is noteworthy as it implies many patients may have consciously avoided going to  
14 hospital during this period, perhaps due to intense media coverage of the event and explicit  
15 instructions from some providers to avoid all non-urgent hospital attendances.

16  
17 Our analysis is broadly consistent with similar studies of this type. Prior work by Ruiz et al<sup>3</sup> has  
18 shown the effects of striking doctors on outpatient cancellations by provider. This work replicates  
19 that effect – during the strike on April 26<sup>th</sup>-27<sup>th</sup> 2016, there was an increase in cancellations of 67%  
20 when compared with average figures from the surrounding weeks. As with Ruiz et al<sup>3</sup> and almost  
21 every previous study of this type both nationally and internationally<sup>6</sup>, this work did not find a  
22 significant effect on mortality among either admitted or A&E patients during strike days. This could  
23 be either because there is no effect, or our study did not have enough power to demonstrate an  
24 effect, due to the small study period involved in strike days. It may be the case that during periods of  
25 industrial action, staffing priority is given to critical care, resulting in small differences in mortality  
26 but a poorer patient experience in non-vital care. This has previously been discussed by Metcalfe et  
27 al in their international comparison of the impacts of industrial action by doctors<sup>6</sup>.

28  
29 This is a large national study which was able to analyse the majority of admissions, outpatient  
30 appointments and A&E visits during the 2016 strikes. Hospital episode statistics have previously  
31 been shown to have reasonable accuracy at both outpatient<sup>10</sup> and inpatient<sup>11</sup> levels. Furthermore,  
32 the strike on April 26<sup>th</sup> and 27<sup>th</sup> also demonstrates the first opportunity for researchers in the UK to  
33 investigate the effects of industrial action upon emergency personnel – previous strikes did not  
34 withhold emergency care. During this period, there was a drop in the number of patients attending  
35 A&E of 17,325 (almost 15%) compared with the expected volume for this time period. We found no  
36 evidence of increased mortality during the study period.

1  
2  
3 The weaknesses of this work are predominantly due to what was not investigated – for example, HES  
4 data alone do not allow the investigation of the effects of strikes upon patients who did not attend  
5 A&E during this period. Furthermore, analysis focused only on the weeks where strikes occurred,  
6 which prevented the capture of lagged effects in the immediate aftermath of a strike. The design of  
7 the study ensured that no outcomes were measured at weekends – this is a limitation, partly due to  
8 the lack of measured outcomes but additionally due to the context of the debate over the existence  
9 of a ‘Weekend Effect’ in mortality. Outcomes (especially mortality) proved difficult to measure.  
10 Death counts during strike days were small, and hence lacking in statistical power, and many  
11 patients stayed in hospital for more than a single day. Importantly, other outcomes such as  
12 morbidity, direct financial costs and opportunity costs for both the NHS (through rescheduling  
13 elective operations and other procedures) and patients (taking time off work, childcare costs etc)  
14 were uncaptured. This study also includes no qualitative element, which prevents us from capturing  
15 unrecorded outcomes of strikes, such as disappointment, inconvenience, stress and worry. Finally,  
16 the occurrence of a national bank holiday on the week of the 2<sup>nd</sup> of May meant that patient profiles  
17 were likely to differ between strike and comparator weeks. As such, in our analysis the second  
18 comparator week for the April strike was replaced with data from the week of May 9<sup>th</sup>-13<sup>th</sup> instead.  
19  
20  
21  
22  
23  
24  
25  
26  
27

## 28 **Conclusions**

29  
30  
31 The four junior doctor’s strikes between January-April 2016 resulted in significant negative impacts  
32 upon patient care as measured by hospital activity. Significant increases in outpatient appointment  
33 cancellations by hospitals were paired with decreases in admitted patients and A&E visits. The major  
34 outcome we investigated was mortality, which showed no measurable change. However, this is likely  
35 to be the least sensitive outcome for quality and safety concerns. These findings may also suggest  
36 that NHS Trusts responded effectively to the industrial action by cancelling outpatient appointments  
37 to protect higher-risk services. Future work in this area should focus on how the strikes affected  
38 waiting times and similar quality outcomes. Strike-related morbidity (such as disease progression in  
39 the time between rescheduled operations/appointments) would likely be a fertile avenue for  
40 investigation. Delays will also be likely to have an associated cost burden in terms of worse patient  
41 outcomes and hence costlier treatment, which should be accounted for. Finally, it should be  
42 determined whether quality of care was negatively impacted in the period immediately following  
43 the strikes.  
44  
45  
46  
47  
48  
49  
50  
51  
52  
53

## 54 **Contributorship statement**

55 Study design: Paul Aylin, Daniel Furnivall  
56  
57  
58  
59  
60

1  
2  
3 Data collection: Daniel Furnivall, Paul Aylin, Alex Bottle

4 Data analysis and interpretation: Daniel Furnivall, Alex Bottle, Paul Aylin

5  
6 Drafting the article: Daniel Furnivall

7  
8 Critical revision of the article: Paul Aylin, Alex Bottle

9  
10 Final approval of version to be published: Paul Aylin, Alex Bottle, Daniel Furnivall

### 11 **Transparency Declaration**

12  
13 Professor Paul Aylin affirms that this manuscript is an honest, accurate, and transparent account of  
14 the study being reported; that no important aspects of the study have been omitted; and that any  
15 discrepancies from the study as planned (and, if relevant, registered) have been explained.  
16  
17

### 18 **Copyright**

19  
20 The Corresponding Author has the right to grant on behalf of all authors and does grant on behalf of  
21 all authors, a worldwide licence to the Publishers and its licensees in perpetuity, in all forms, formats  
22 and media (whether known now or created in the future), to i) publish, reproduce, distribute, display  
23 and store the Contribution, ii) translate the Contribution into other languages, create adaptations,  
24 reprints, include within collections and create summaries, extracts and/or, abstracts of the  
25 Contribution, iii) create any other derivative work(s) based on the Contribution, iv) to exploit all  
26 subsidiary rights in the Contribution, v) the inclusion of electronic links from the Contribution to  
27 third party material where-ever it may be located; and, vi) licence any third party to do any or all of  
28 the above.  
29  
30  
31  
32  
33  
34

### 35 **Competing Interests Declaration**

36  
37 All authors have completed the ICMJE uniform disclosure form at [www.icmje.org/coi\\_disclosure.pdf](http://www.icmje.org/coi_disclosure.pdf)  
38 (available on request from the corresponding author) and declare: no support from any organisation  
39 for the submitted work; no other relationships or activities that could appear to have influenced the  
40 submitted work. PA is principal investigator for The Dr Foster Unit, an academic unit in the  
41 Department of Primary Care and Public Health, within the School of Public Health, Imperial College  
42 London. The unit receives research funding from Dr Foster Intelligence, an independent health  
43 service research organisation (a wholly owned subsidiary of Telstra).  
44  
45  
46  
47  
48

### 49 **Funding acknowledgements**

50  
51 NIHR Programme Grants for Applied Research: RDPSC 79560

52  
53 The Dr Foster Unit is an academic unit in the Department of Primary Care and Public Health, within  
54 the School of Public Health, Imperial College London. The unit receives research funding from the  
55 National Institute of Health Research and Dr Foster Intelligence, an independent health service  
56  
57  
58  
59

research organisation (a wholly owned subsidiary of Telstra). The Dr Foster Unit at Imperial is affiliated with the National Institute of Health Research (NIHR) Imperial Patient Safety Translational Research Centre. The NIHR Imperial Patient Safety Translational Centre is a partnership between the Imperial College Healthcare NHS Trust and Imperial College London. The Department of Primary Care & Public Health at Imperial College London is grateful for support from the NW London NIHR Collaboration for Leadership in Applied Health Research & Care (CLAHRC) and the Imperial NIHR Biomedical Research Centre.

## Ethics

The principal investigator has approval from the Secretary of State and the Health Research Authority under Regulation 5 of the Health Service (Control of Patient Information) Regulations 2002 to hold confidential data and analyse them for research purposes (CAG ref 15/CAG/0005). We have approval to use them for research and measuring quality of delivery of healthcare, from the London - South East Ethics Committee (REC ref 15/LO/0824).

## Data Sharing Statement

All SAS code used in the study is available upon request from the corresponding author.

## References

1. Godlee F. Breaking point. *BMJ* 2016; **353**.
2. Toynbee M, Al-Diwani AA, Clacey J, Broome MR. Should junior doctors strike? *Journal of medical ethics* 2016; **42**(3): 167-70.
3. Ruiz M, Bottle A, Aylin P. A retrospective study on the impact of the doctors' strike in England on 21 June 2012. *Journal of the Royal Society of Medicine* 2013: 0141076813490685.
4. McKay AJ, Majeed A. Junior Doctors in England Strike for the First Time in 40 Years. *The Journal of Ambulatory Care Management* 2016; **39**(2): 178-81.
5. Jena AB, Prasad V, Goldman DP, Romley J. Mortality and treatment patterns among patients hospitalized with acute cardiovascular conditions during dates of national cardiology meetings. *JAMA Internal Medicine* 2015; **175**(2): 237-44.
6. Metcalfe D, Chowdhury R, Salim A. What are the consequences when doctors strike? *BMJ* 2015; **351**.
7. Trigg N. Disruption to patients 'more limited than feared'. BBC News. 2012.
8. Aylin P, Bottle A, Jen MH, Middleton S, Intelligence F. HSMR mortality indicators. *Imperial College Technical Document 26th November 2010*.
9. NHS. Pennine Acute Hospitals Junior Doctor's National Strike 12 January: Patients advised to avoid coming to hospital unless absolutely necessary. 2016.
10. Thorn JC, Turner E, Hounscome L, et al. Validation of the Hospital Episode Statistics Outpatient Dataset in England. *PharmacoEconomics* 2016; **34**(2): 161-8.
11. Thorn JC, Turner EL, Hounscome L, et al. Validating the use of Hospital Episode Statistics data and comparison of costing methodologies for economic evaluation: an end-of-life case study from the Cluster randomised triAl of PSA testing for Prostate cancer (CAP). *BMJ open* 2016; **6**(4): e011063.

1  
2  
3  
4  
5  
6  
7  
8  
9  
10  
11  
12  
13  
14  
15  
16  
17  
18  
19  
20  
21  
22  
23  
24  
25  
26  
27  
28  
29  
30  
31  
32  
33  
34  
35  
36  
37  
38  
39  
40  
41  
42  
43  
44  
45  
46  
47  
48  
49  
50  
51  
52  
53  
54  
55  
56  
57  
58  
59  
60

**Figure Legend**

Figure 1: Impacts of each of the four strikes on hospital activity across all strikes and types of care

Figure 2: Volume of provider cancellations by day during the week in which each of the four strikes occurred. Vertical grey lines on the graph represent strike days.

For peer review only

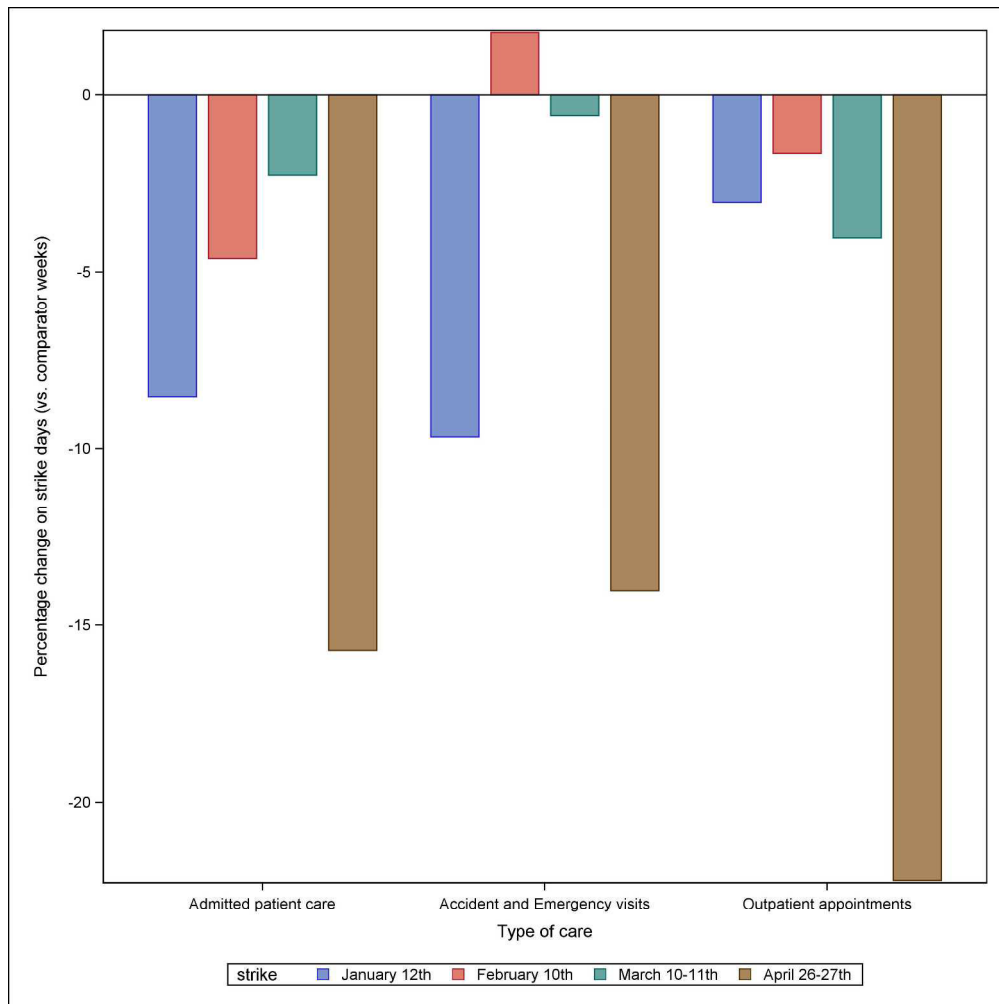

Impacts of each of the four strikes on hospital activity across all strikes and types of care

254x254mm (300 x 300 DPI)

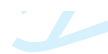

1  
2  
3  
4  
5  
6  
7  
8  
9  
10  
11  
12  
13  
14  
15  
16  
17  
18  
19  
20  
21  
22  
23  
24  
25  
26  
27  
28  
29  
30  
31  
32  
33  
34  
35  
36  
37  
38  
39  
40  
41  
42  
43  
44  
45  
46  
47  
48  
49  
50  
51  
52  
53  
54  
55  
56  
57  
58  
59  
60



Volume of provider cancellations by day during the week in which each of the four strikes occurred. Vertical grey lines on the graph represent strike days.

279x215mm (300 x 300 DPI)

View only

## STROBE Statement—checklist of items that should be included in reports of observational studies

|                              | Item No | Recommendation                                                                                                                                                                                                                                                                                                                                                                                                                                                                                                                                                                                                                                                                                                          |
|------------------------------|---------|-------------------------------------------------------------------------------------------------------------------------------------------------------------------------------------------------------------------------------------------------------------------------------------------------------------------------------------------------------------------------------------------------------------------------------------------------------------------------------------------------------------------------------------------------------------------------------------------------------------------------------------------------------------------------------------------------------------------------|
| <b>Title and abstract</b>    | 1       | (a) Indicate the study's design with a commonly used term in the title or the abstract <b>(Page 1)</b><br>(b) Provide in the abstract an informative and balanced summary of what was done and what was found <b>(Page 2)</b>                                                                                                                                                                                                                                                                                                                                                                                                                                                                                           |
| <b>Introduction</b>          |         |                                                                                                                                                                                                                                                                                                                                                                                                                                                                                                                                                                                                                                                                                                                         |
| Background/rationale         | 2       | Explain the scientific background and rationale for the investigation being reported <b>(Pages 2&amp;3)</b>                                                                                                                                                                                                                                                                                                                                                                                                                                                                                                                                                                                                             |
| Objectives                   | 3       | State specific objectives, including any prespecified hypotheses <b>(Centre of page 3)</b>                                                                                                                                                                                                                                                                                                                                                                                                                                                                                                                                                                                                                              |
| <b>Methods</b>               |         |                                                                                                                                                                                                                                                                                                                                                                                                                                                                                                                                                                                                                                                                                                                         |
| Study design                 | 4       | Present key elements of study design early in the paper <b>(Pages 3&amp;4)</b>                                                                                                                                                                                                                                                                                                                                                                                                                                                                                                                                                                                                                                          |
| Setting                      | 5       | Describe the setting, locations, and relevant dates, including periods of recruitment, exposure, follow-up, and data collection <b>(Page 4)</b>                                                                                                                                                                                                                                                                                                                                                                                                                                                                                                                                                                         |
| Participants                 | 6       | (a) <i>Cohort study</i> —Give the eligibility criteria, and the sources and methods of selection of participants. Describe methods of follow-up<br><i>Case-control study</i> —Give the eligibility criteria, and the sources and methods of case ascertainment and control selection. Give the rationale for the choice of cases and controls<br><i>Cross-sectional study</i> —Give the eligibility criteria, and the sources and methods of selection of participants <b>(Pages 4&amp;5)</b><br>(b) <i>Cohort study</i> —For matched studies, give matching criteria and number of exposed and unexposed<br><i>Case-control study</i> —For matched studies, give matching criteria and the number of controls per case |
| Variables                    | 7       | Clearly define all outcomes, exposures, predictors, potential confounders, and effect modifiers. Give diagnostic criteria, if applicable <b>(Page 5&amp;6)</b>                                                                                                                                                                                                                                                                                                                                                                                                                                                                                                                                                          |
| Data sources/<br>measurement | 8*      | For each variable of interest, give sources of data and details of methods of assessment (measurement). Describe comparability of assessment methods if there is more than one group <b>(Page 3)</b>                                                                                                                                                                                                                                                                                                                                                                                                                                                                                                                    |
| Bias                         | 9       | Describe any efforts to address potential sources of bias <b>(Top of page 4)</b>                                                                                                                                                                                                                                                                                                                                                                                                                                                                                                                                                                                                                                        |
| Study size                   | 10      | Explain how the study size was arrived at <b>(N/A - entire population)</b>                                                                                                                                                                                                                                                                                                                                                                                                                                                                                                                                                                                                                                              |
| Quantitative variables       | 11      | Explain how quantitative variables were handled in the analyses. If applicable, describe which groupings were chosen and why <b>(N/A – counts only)</b>                                                                                                                                                                                                                                                                                                                                                                                                                                                                                                                                                                 |
| Statistical methods          | 12      | (a) Describe all statistical methods, including those used to control for confounding <b>(page 4,5,6)</b><br>(b) Describe any methods used to examine subgroups and interactions <b>(Pages 5+10)</b><br>(c) Explain how missing data were addressed <b>(N/A)</b><br>(d) <i>Cohort study</i> —If applicable, explain how loss to follow-up was addressed<br><i>Case-control study</i> —If applicable, explain how matching of cases and controls was addressed<br><i>Cross-sectional study</i> —If applicable, describe analytical methods taking account of sampling strategy <b>(Pages 3&amp;4)</b><br>(e) Describe any sensitivity analyses <b>(N/A)</b>                                                              |

Continued on next page



**Results**

|                  |     |                                                                                                                                                                                                                                                                                                                                                                                                                                      |
|------------------|-----|--------------------------------------------------------------------------------------------------------------------------------------------------------------------------------------------------------------------------------------------------------------------------------------------------------------------------------------------------------------------------------------------------------------------------------------|
| Participants     | 13* | (a) Report numbers of individuals at each stage of study—eg numbers potentially eligible, examined for eligibility, confirmed eligible, included in the study, completing follow-up, and analysed ( <b>Pages 5&amp;6</b> )<br>(b) Give reasons for non-participation at each stage (N/A)<br>(c) Consider use of a flow diagram (N/A)                                                                                                 |
| Descriptive data | 14* | (a) Give characteristics of study participants (eg demographic, clinical, social) and information on exposures and potential confounders ( <b>N/A – entire population</b> )<br>(b) Indicate number of participants with missing data for each variable of interest ( <b>N/A</b> )<br>(c) <i>Cohort study</i> —Summarise follow-up time (eg, average and total amount)                                                                |
| Outcome data     | 15* | <i>Cohort study</i> —Report numbers of outcome events or summary measures over time<br><i>Case-control study</i> —Report numbers in each exposure category, or summary measures of exposure<br><i>Cross-sectional study</i> —Report numbers of outcome events or summary measures ( <b>Pages 5&amp;6</b> )                                                                                                                           |
| Main results     | 16  | (a) Give unadjusted estimates and, if applicable, confounder-adjusted estimates and their precision (eg, 95% confidence interval). Make clear which confounders were adjusted for and why they were included ( <b>Page 5,6,10</b> )<br>(b) Report category boundaries when continuous variables were categorized<br>(c) If relevant, consider translating estimates of relative risk into absolute risk for a meaningful time period |
| Other analyses   | 17  | Report other analyses done—eg analyses of subgroups and interactions, and sensitivity analyses ( <b>Page 10 – regional analysis</b> )                                                                                                                                                                                                                                                                                                |

**Discussion**

|                  |    |                                                                                                                                                                                               |
|------------------|----|-----------------------------------------------------------------------------------------------------------------------------------------------------------------------------------------------|
| Key results      | 18 | Summarise key results with reference to study objectives ( <b>Page 11</b> )                                                                                                                   |
| Limitations      | 19 | Discuss limitations of the study, taking into account sources of potential bias or imprecision. Discuss both direction and magnitude of any potential bias ( <b>Page 12</b> )                 |
| Interpretation   | 20 | Give a cautious overall interpretation of results considering objectives, limitations, multiplicity of analyses, results from similar studies, and other relevant evidence ( <b>Page 12</b> ) |
| Generalisability | 21 | Discuss the generalisability (external validity) of the study results ( <b>Page 12</b> )                                                                                                      |

**Other information**

|         |    |                                                                                                                                                                                  |
|---------|----|----------------------------------------------------------------------------------------------------------------------------------------------------------------------------------|
| Funding | 22 | Give the source of funding and the role of the funders for the present study and, if applicable, for the original study on which the present article is based ( <b>Page 14</b> ) |
|---------|----|----------------------------------------------------------------------------------------------------------------------------------------------------------------------------------|

\*Give information separately for cases and controls in case-control studies and, if applicable, for exposed and unexposed groups in cohort and cross-sectional studies.

**Note:** An Explanation and Elaboration article discusses each checklist item and gives methodological background and published examples of transparent reporting. The STROBE checklist is best used in conjunction with this article (freely available on the Web sites of PLoS Medicine at <http://www.plosmedicine.org/>, Annals of Internal Medicine at <http://www.annals.org/>, and Epidemiology at <http://www.epidem.com/>). Information on the STROBE Initiative is available at [www.strobe-statement.org](http://www.strobe-statement.org).
